# Supplementary material for: (7,8-Dicarba-nido-undecaboran-7-yl)acetic acid: synthesis of individual enantiomers and the first example of the determination of the absolute configuration of chiral monosubstituted nido-carborane
Source: Royal Society of Chemistry journal article supplement (doi:10.1039/d2nj02994d), 2022-01-01
Supplement: d2nj02994d1.pdf [file d2nj02994d1.pdf]

## Supporting information

### **(7,8-Dicarba-*nido*-undecaboran-7-yl)acetic acid: synthesis of individual enantiomers and the first example of determination of absolute configuration of chiral *nido*-carborane**

Dmitry A. Gruzdev,\* Angelina A. Telegina, Evgeny N. Chulakov, Galina L. Levit and Victor P. Krasnov

#### **Table of contents**

|                                                                        |     |
|------------------------------------------------------------------------|-----|
| 1. Configuration assignment of <i>nido</i> -carborane derivatives..... | S2  |
| 2. NMR spectra.....                                                    | S4  |
| 3. Selected HPLC chromatograms.....                                    | S30 |

## 1. Configuration assignment of *nido*-carborane derivatives

**Benzyl (*S<sub>p</sub>*)-(nido-carboranyl)acetate, caesium salt [(*S<sub>p</sub>*)-11-Cs].** Caesium fluoride (0.77 mg, 5.04 mmol) and HCl conc. (0.28 mL, 3.36 mmol) were added to a solution of benzyl (*R<sub>p</sub>*)-(3-amino-*closo*-carboran-1-yl)acetate [(*R<sub>p</sub>*)-9]<sup>51</sup> (0.52 g, 1.68 mmol) in BnOH (17 mL). The reaction mixture was stirred at 80 °C for 12 h. EtOAc (40 mL) was added and the solution was washed with H<sub>2</sub>O (3 × 25 mL). Organic layer was evaporated to dryness under reduced pressure. The residue was subjected to flash column chromatography (eluent CH<sub>2</sub>Cl<sub>2</sub>–EtOH from 95 : 5 to 8 : 2) to afford compound (*S<sub>p</sub>*)-11-Cs as a slow eluting component. Yield 97.8 mg (14%). Hygroscopic semisolid. NMR spectra were identical to those of compound 11-K (see the Experimental section). HRMS ESI(–), *m/z* calcd for C<sub>11</sub>H<sub>20</sub><sup>11</sup>B<sub>9</sub>O<sub>2</sub> [M – Cs]<sup>–</sup>: 283.2323, found 283.2322.

**(*S<sub>p</sub>*)-(nido-Carboranyl)acetic acid, potassium Salt [(*S<sub>p</sub>*)-1-K].** Concentrated HCl (2.7 mL) was added to a solution of compound (*S<sub>p</sub>*)-11-Cs (93 mg, 0.22 mmol) in AcOH (2.7 mL). The mixture was heated at 102–105 °C for 15 h, then evaporated to dryness under reduced pressure. 4 N HCl (7 mL) was added to the residue and the mixture was extracted with Et<sub>2</sub>O (3 × 10 mL). Organic layers were washed with 4 N HCl (10 mL), dried with Na<sub>2</sub>SO<sub>4</sub> and evaporated to dryness under reduced pressure. The residue was dissolved in ethanolic solution of KOH (0.85 N, 1.2 mL). The resulting solution was filtered, then an excess of solid CO<sub>2</sub> was added. The precipitate was filtered off and the filtrate was evaporated to dryness under reduced pressure. Yield 60.1 mg (99%). Hygroscopic semisolid. NMR spectra were identical to those of compound (*R<sub>p</sub>*)-1-K obtained starting from compound (*S, R<sub>p</sub>*)-7a (see the Experimental section). [α]<sub>D</sub><sup>20</sup> –5.0 (*c* 0.23, acetone–MeOH 4 : 1). HPLC (*S, S*-Whelk O1, MeOH–H<sub>2</sub>O–AcOH–Et<sub>3</sub>N 40.00 : 59.90 : 0.05 : 0.05, 0.75 mL/min): τ 35.48 min. HRMS ESI(–), *m/z* calcd for C<sub>4</sub>H<sub>14</sub><sup>11</sup>B<sub>9</sub>O<sub>2</sub> [M – 2K + H]<sup>–</sup>: 193.1837, found 193.1838.

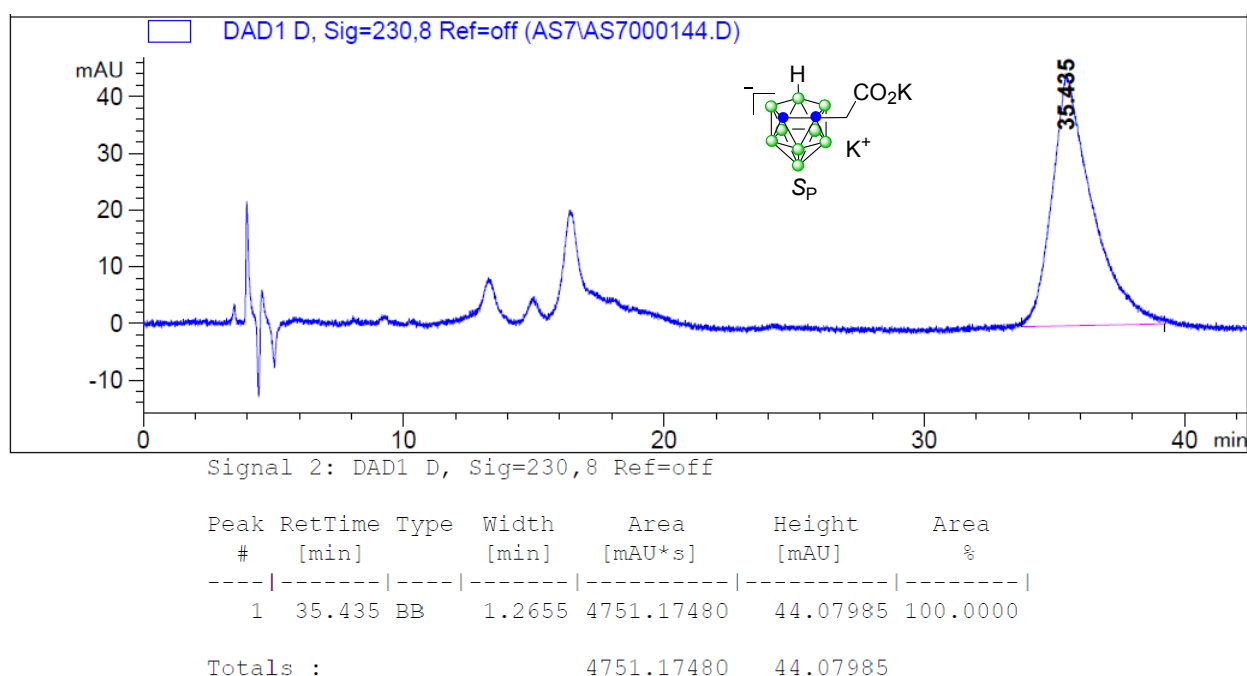

**Figure S1** HPLC chromatogram of compound (*S<sub>p</sub>*)-(-)-1-K obtained from the known compound (*R<sub>p</sub>*)-9

<sup>51</sup> D. A. Gruzdev, V. O. Ustinova, E. N. Chulakov, V. A. Ol'shevskaya, G. L. Levit, P. A. Slepukhin, V. P. Krasnov and V. N. Charushin, *J. Organomet. Chem.*, 2018, **876**, 50–56.

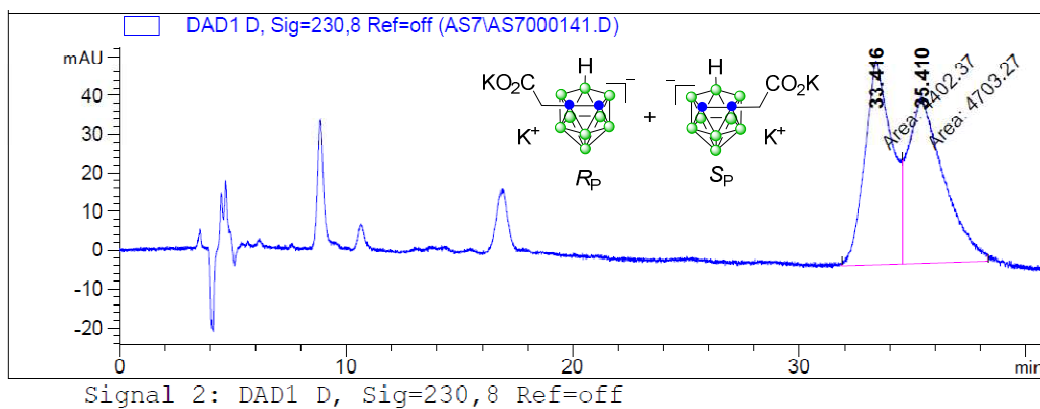

**Figure S2 HPLC chromatogram of racemic compound 1-K**

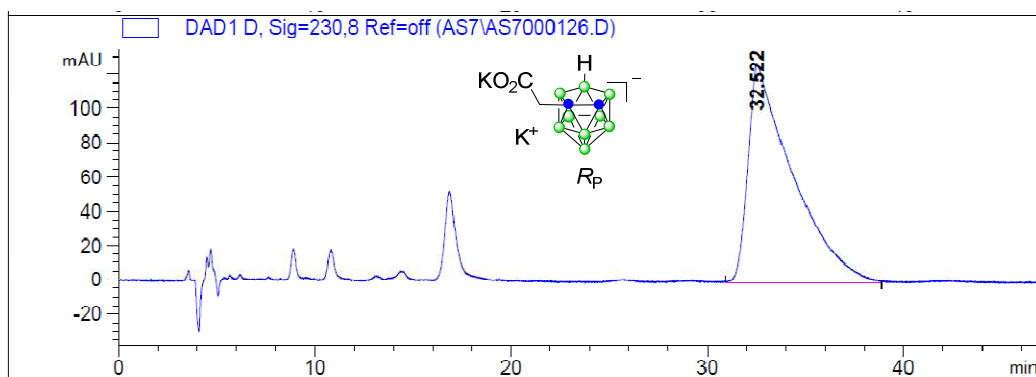

**Figure S3 HPLC chromatogram of compound (*R<sub>p</sub>*)-(+)-1-K obtained from amide (*S,R<sub>p</sub>*)-7a**

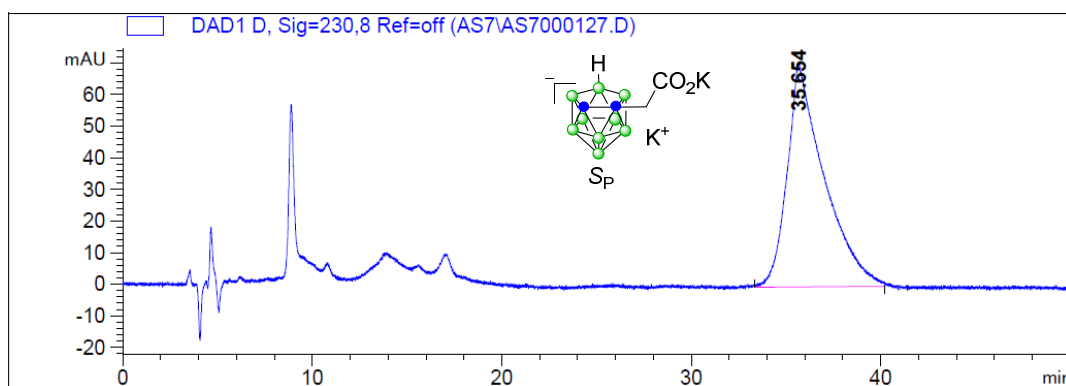

**Figure S4 HPLC chromatogram of compound (*S<sub>p</sub>*)-(-)-1-K obtained from amide (*S,S<sub>p</sub>*)-7a**

## 2. NMR spectra

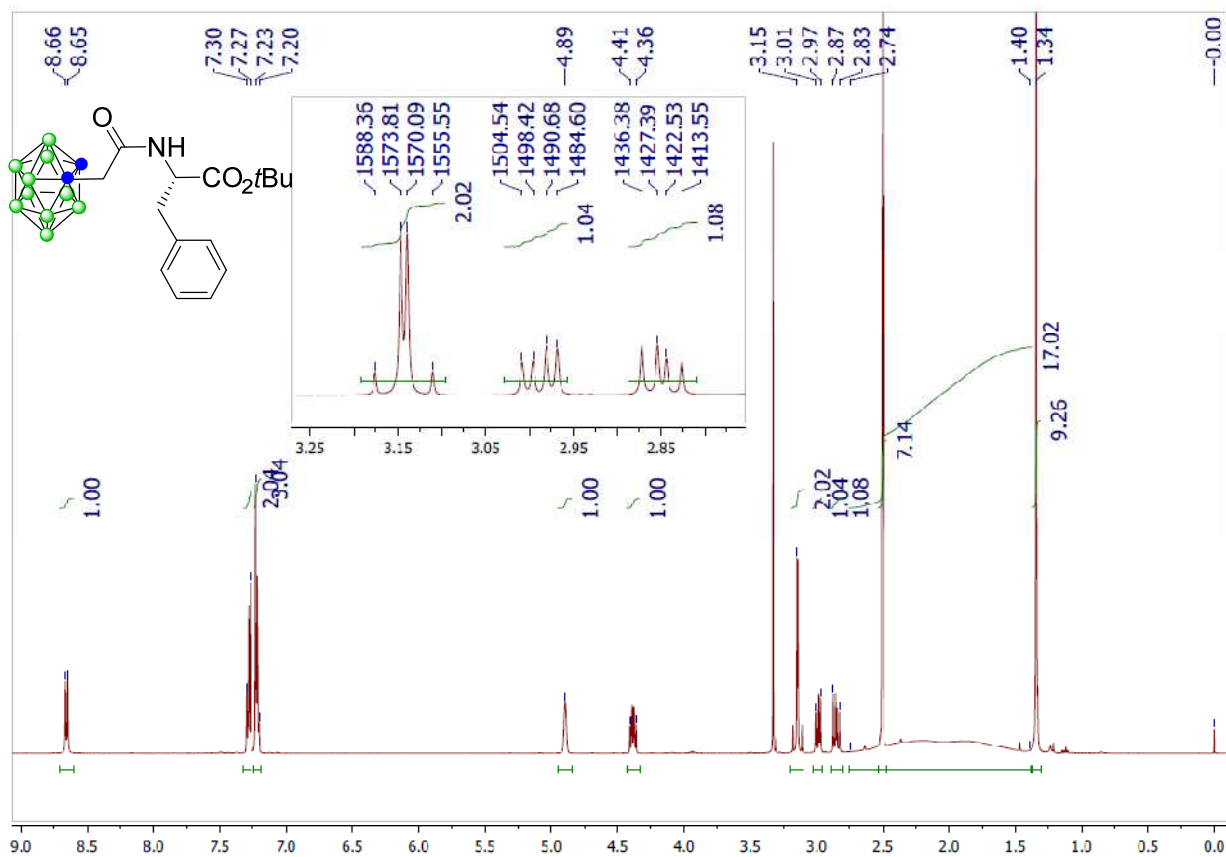

<sup>1</sup>H NMR spectrum of compound **3a** (DMSO-*d*<sub>6</sub>, 25 °C, 500 MHz)

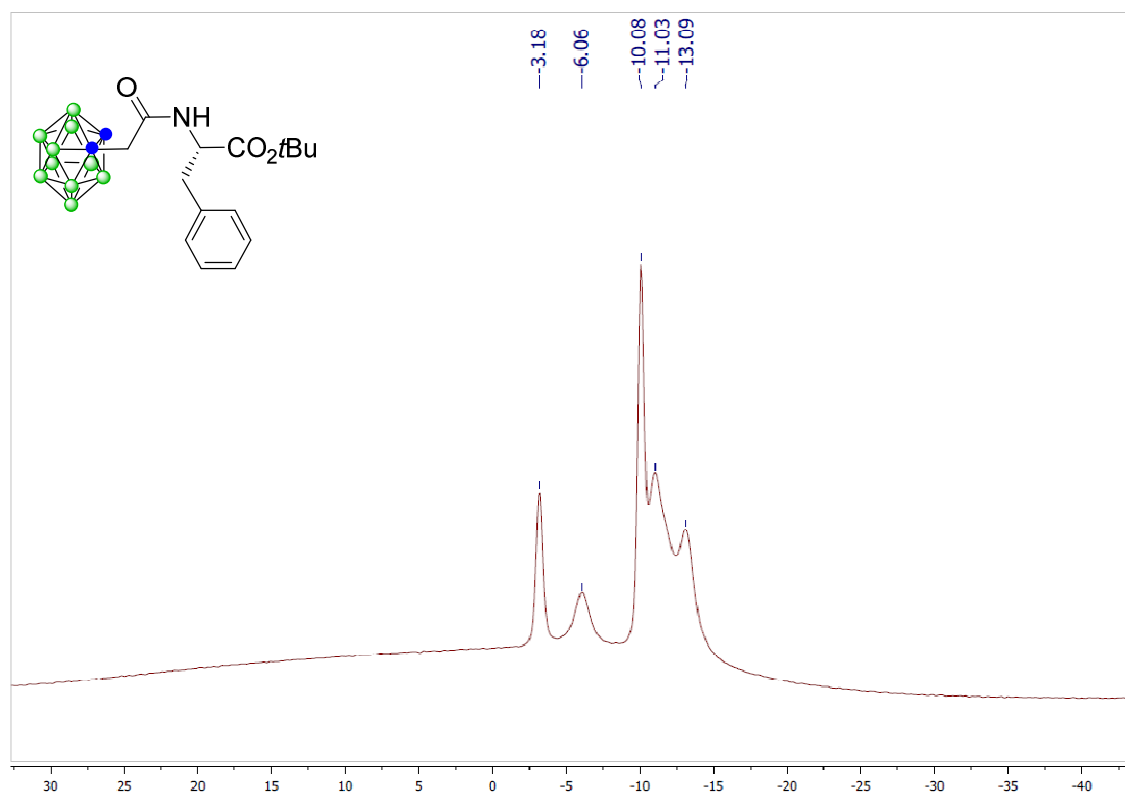

<sup>11</sup>B{<sup>1</sup>H} NMR spectrum of compound **3a** (DMSO-*d*<sub>6</sub>, 25 °C, 160 MHz)

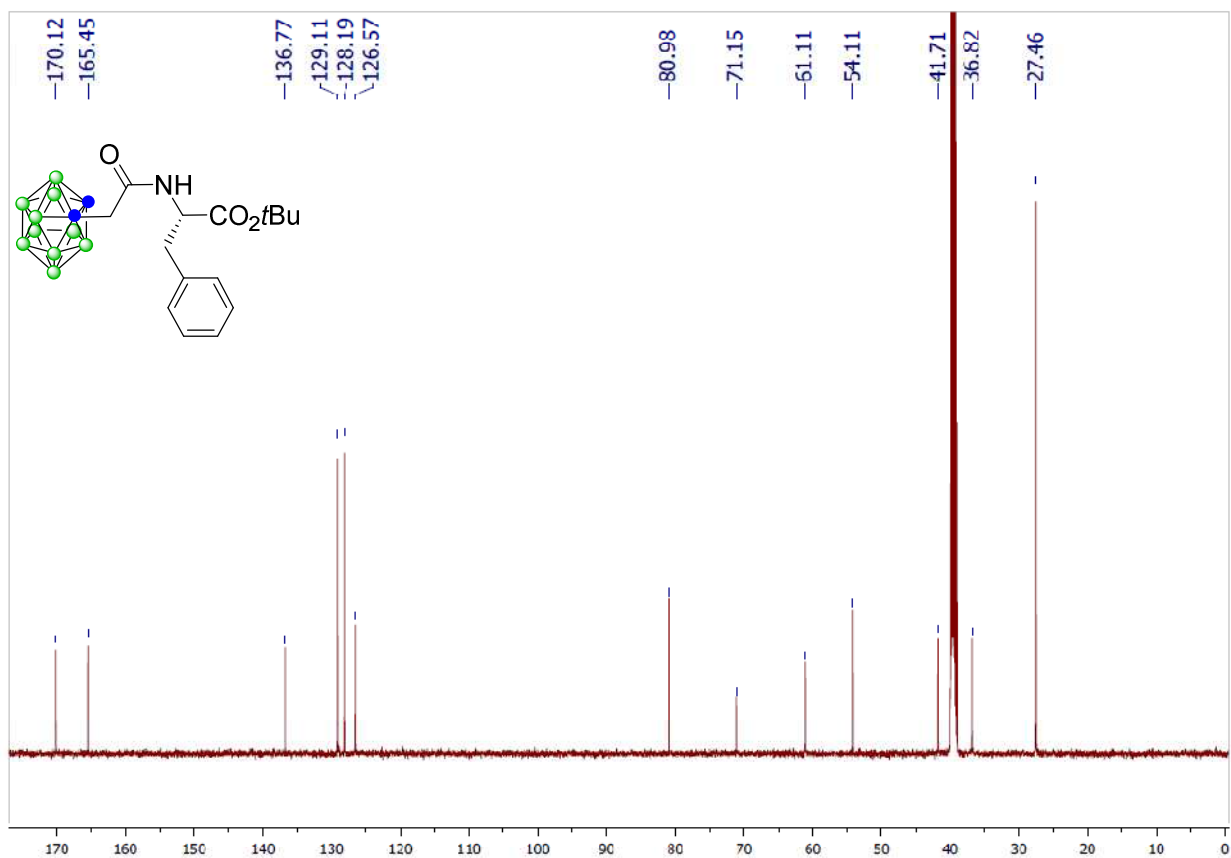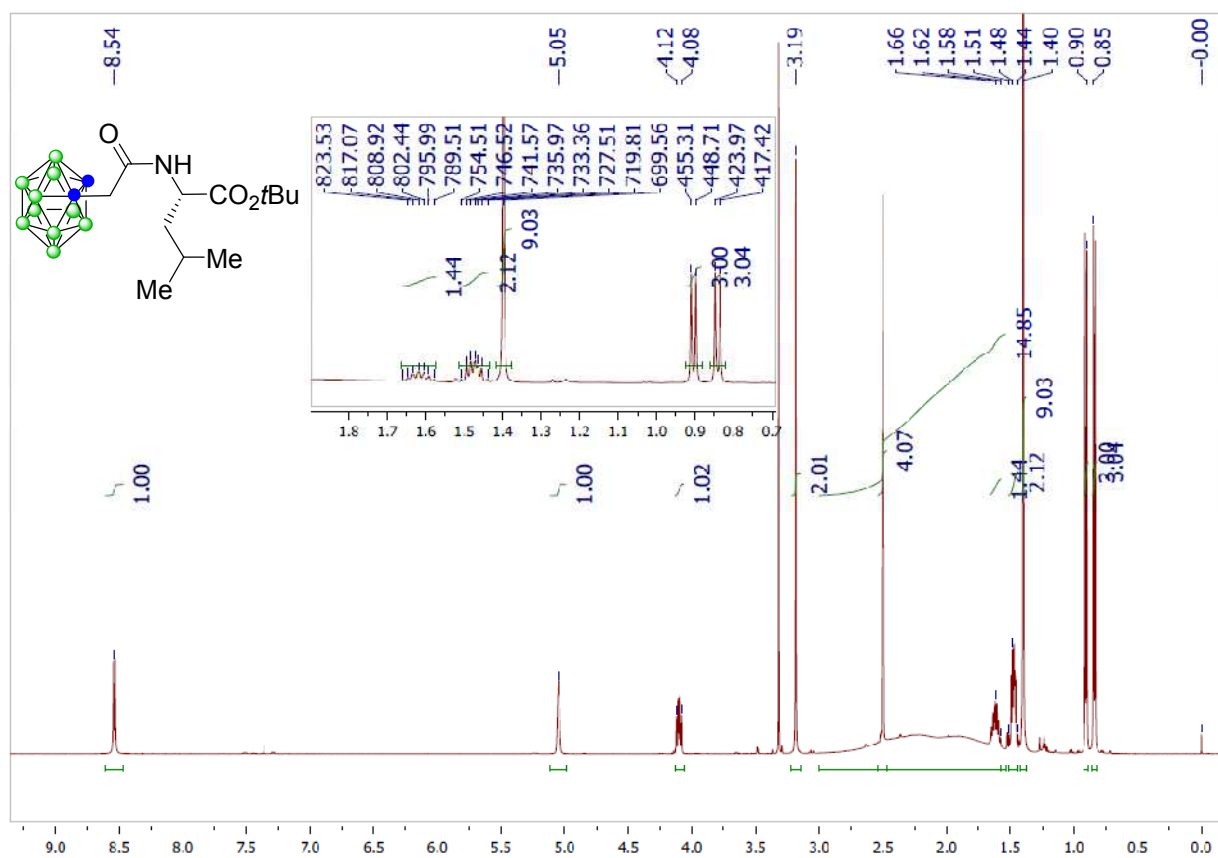

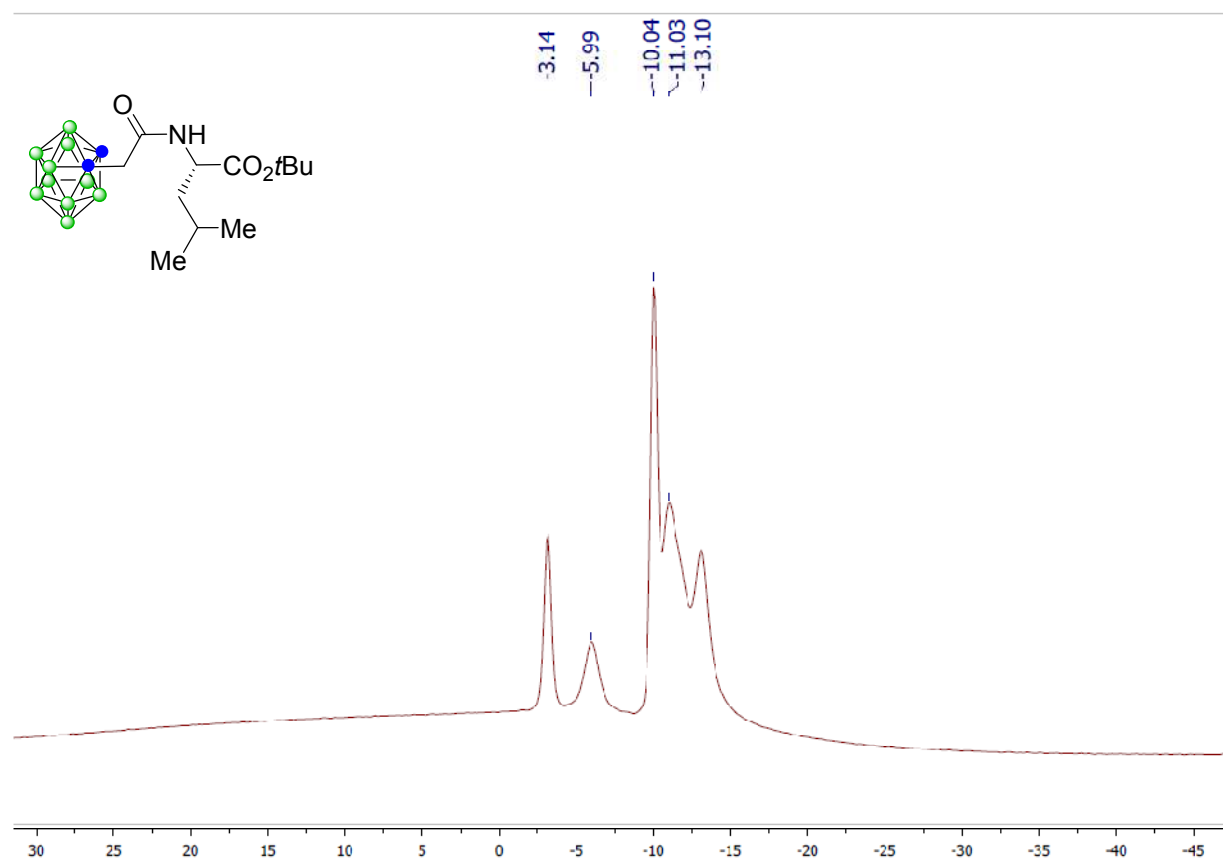

<sup>11</sup>B{<sup>1</sup>H} NMR spectrum of compound **3b** (DMSO-*d*<sub>6</sub>, 25 °C, 160 MHz)

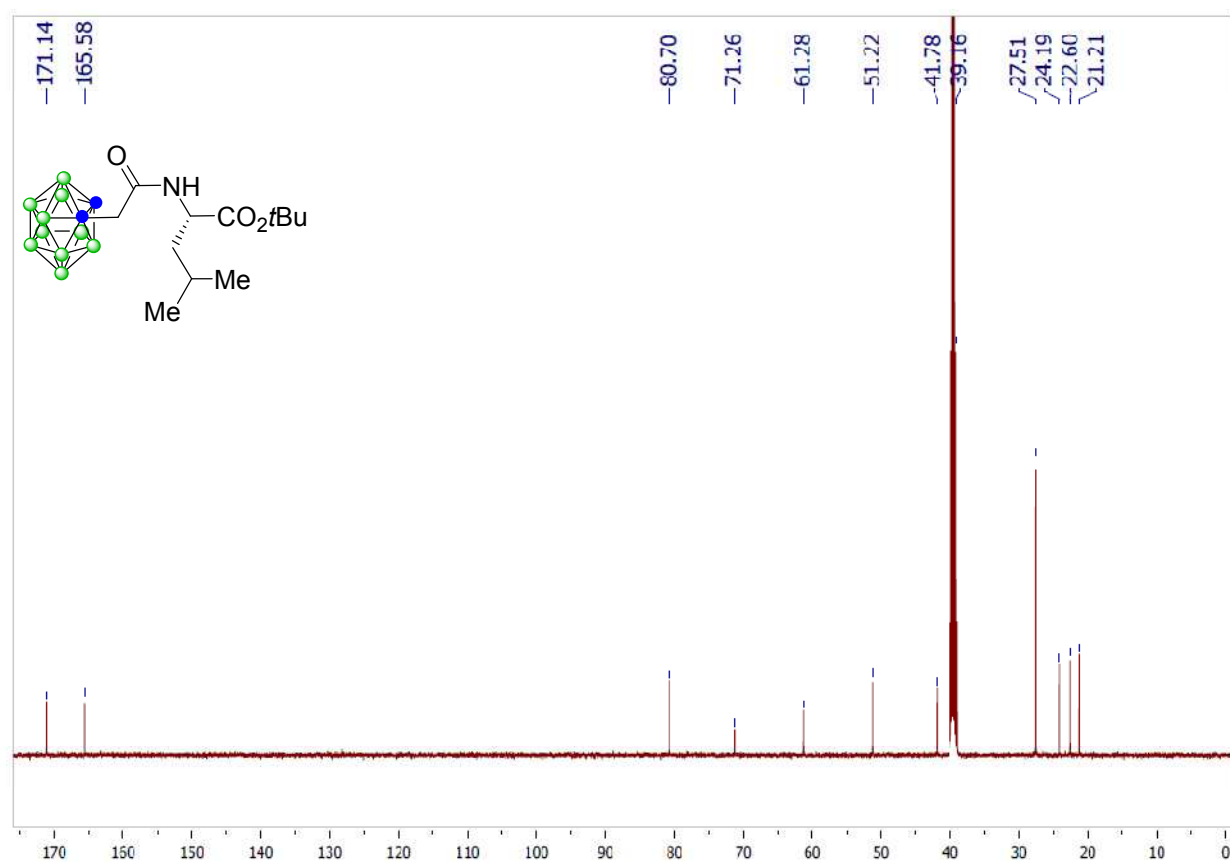

<sup>13</sup>C{<sup>1</sup>H} NMR spectrum of compound **3b** (DMSO-*d*<sub>6</sub>, 25 °C, 126 MHz)

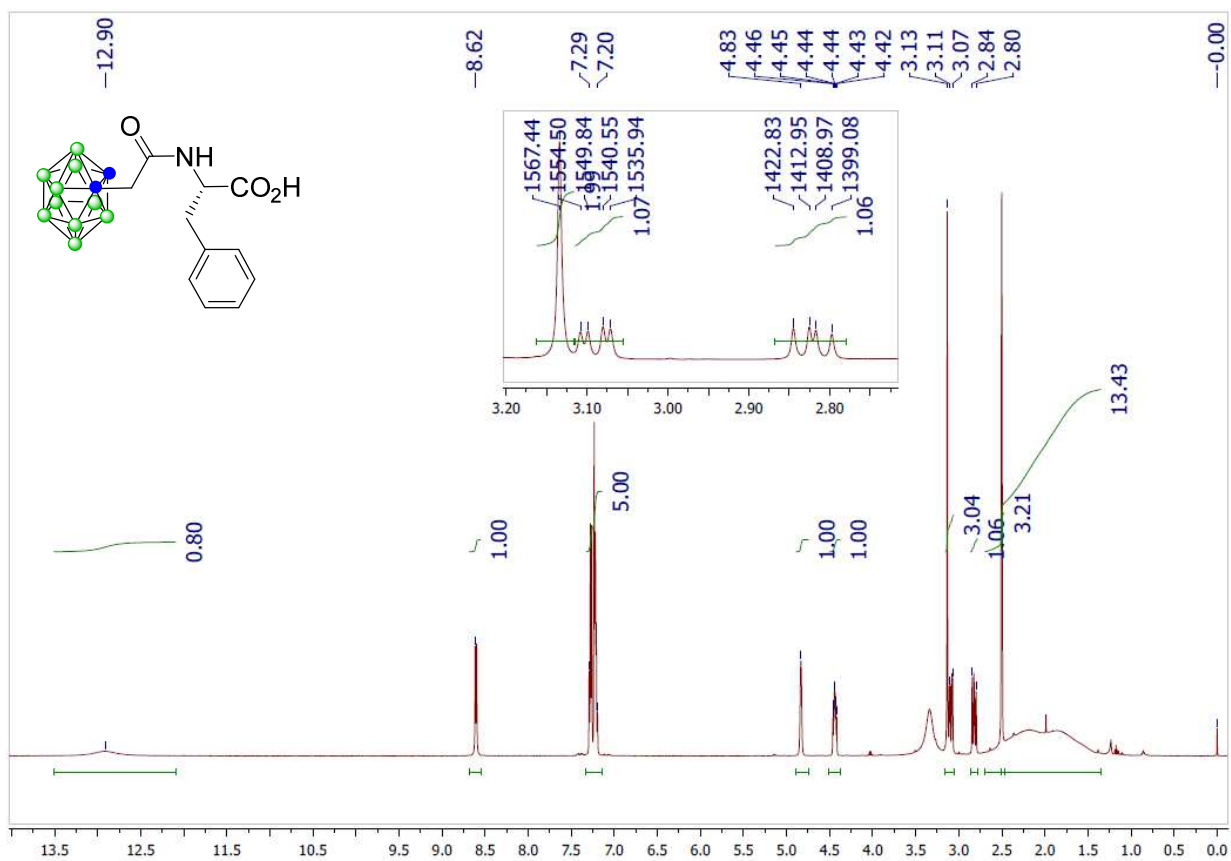

$^1\text{H}$  NMR spectrum of compound **4a** (DMSO- $d_6$ , 25 °C, 500 MHz)

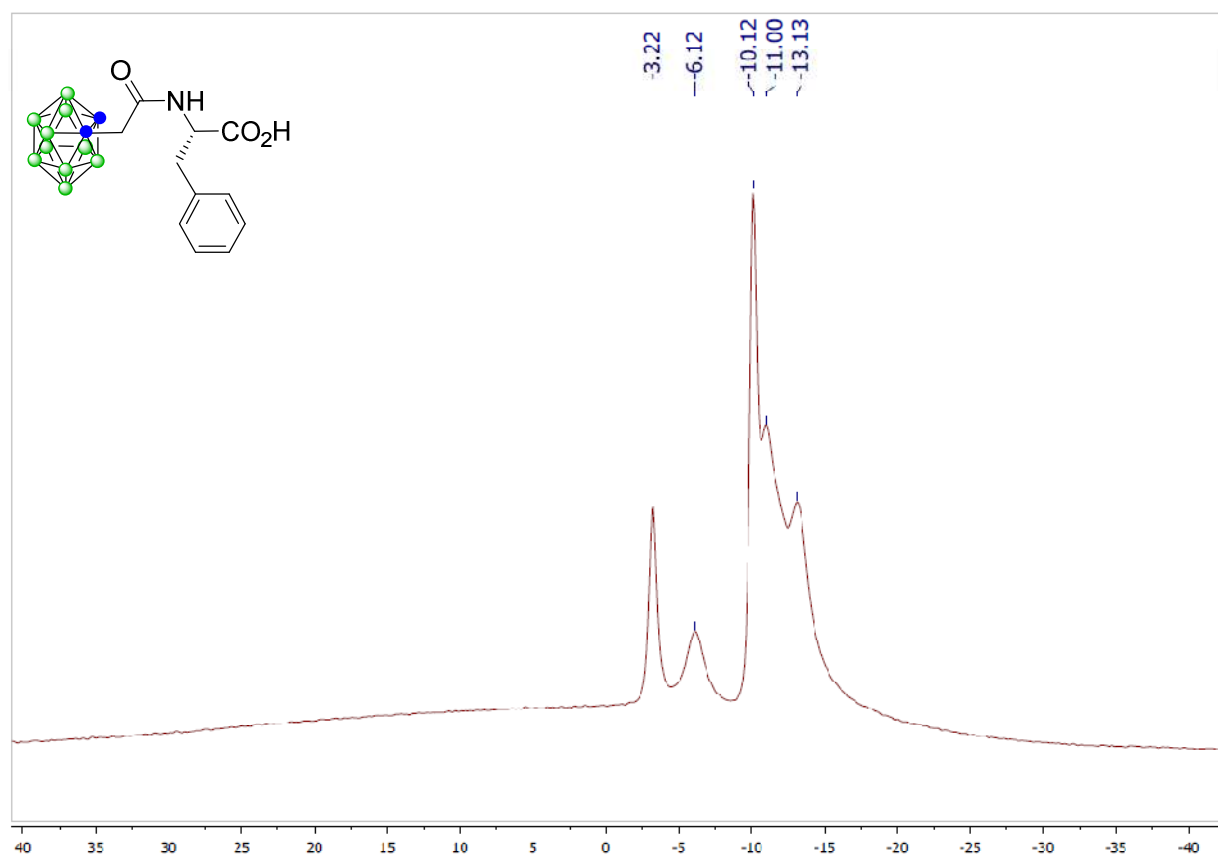

$^{11}\text{B}\{^1\text{H}\}$  NMR spectrum of compound **4a** (DMSO- $d_6$ , 25 °C, 160 MHz)

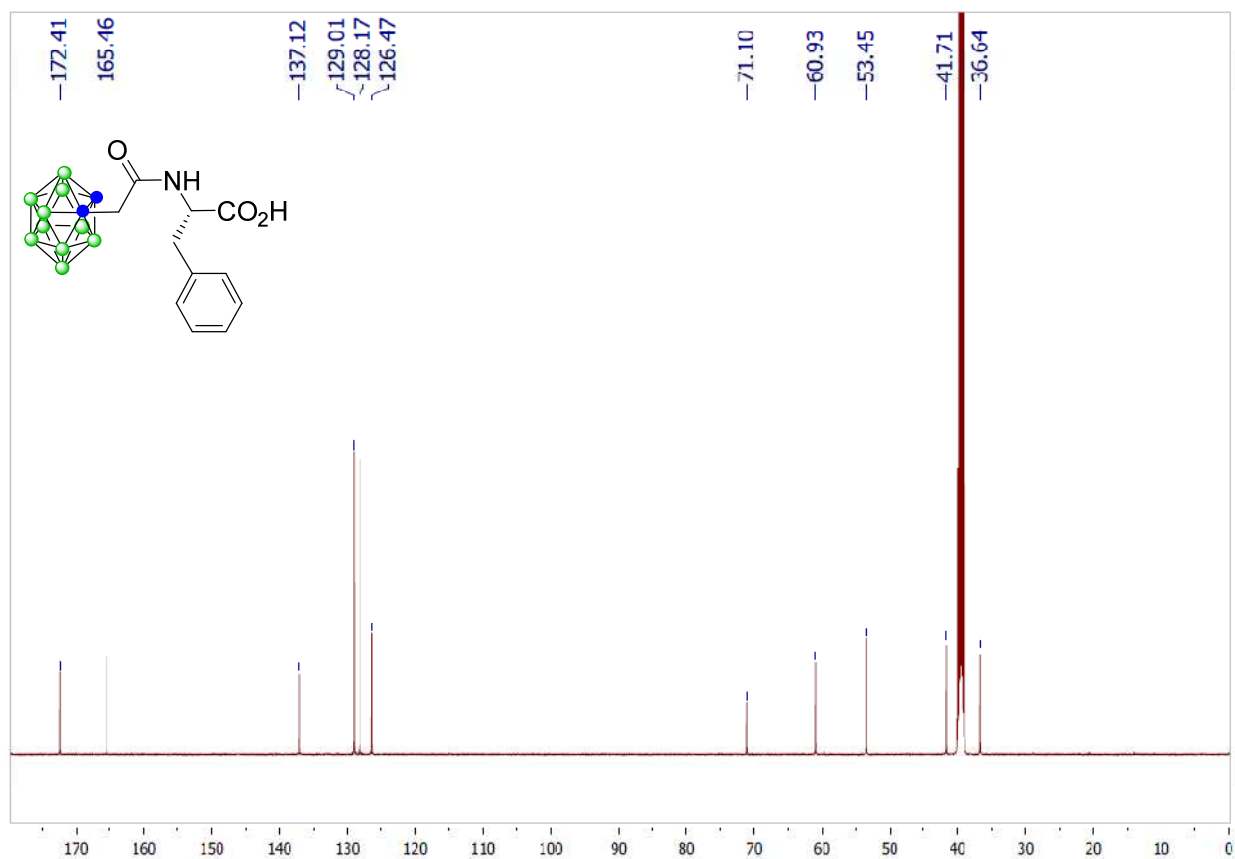

$^{13}\text{C}\{^1\text{H}\}$  NMR spectrum of compound **4a** (DMSO- $d_6$ , 25 °C, 126 MHz)

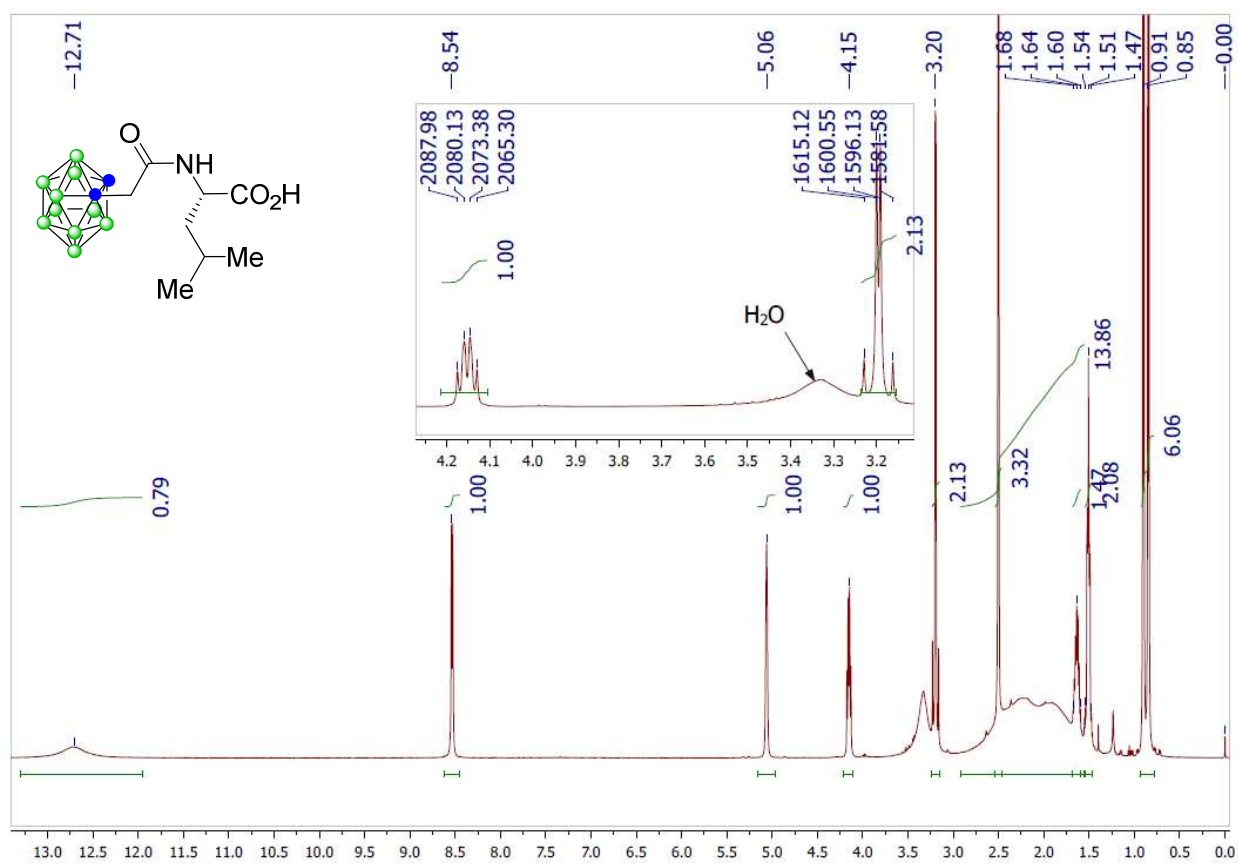

$^1\text{H}$  NMR spectrum of compound **4b** (DMSO- $d_6$ , 25 °C, 500 MHz)



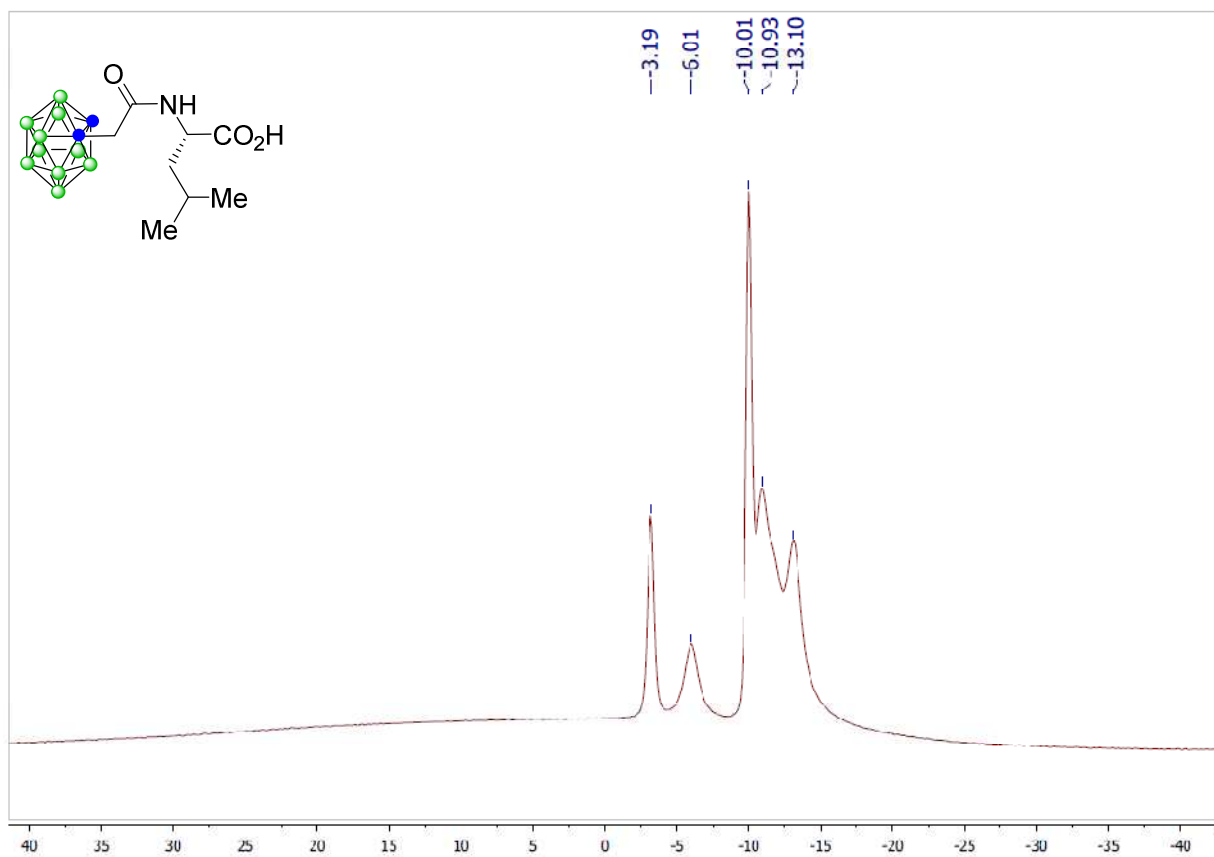

<sup>11</sup>B{<sup>1</sup>H} NMR spectrum of compound **4b** (DMSO-*d*<sub>6</sub>, 25 °C, 160 MHz)

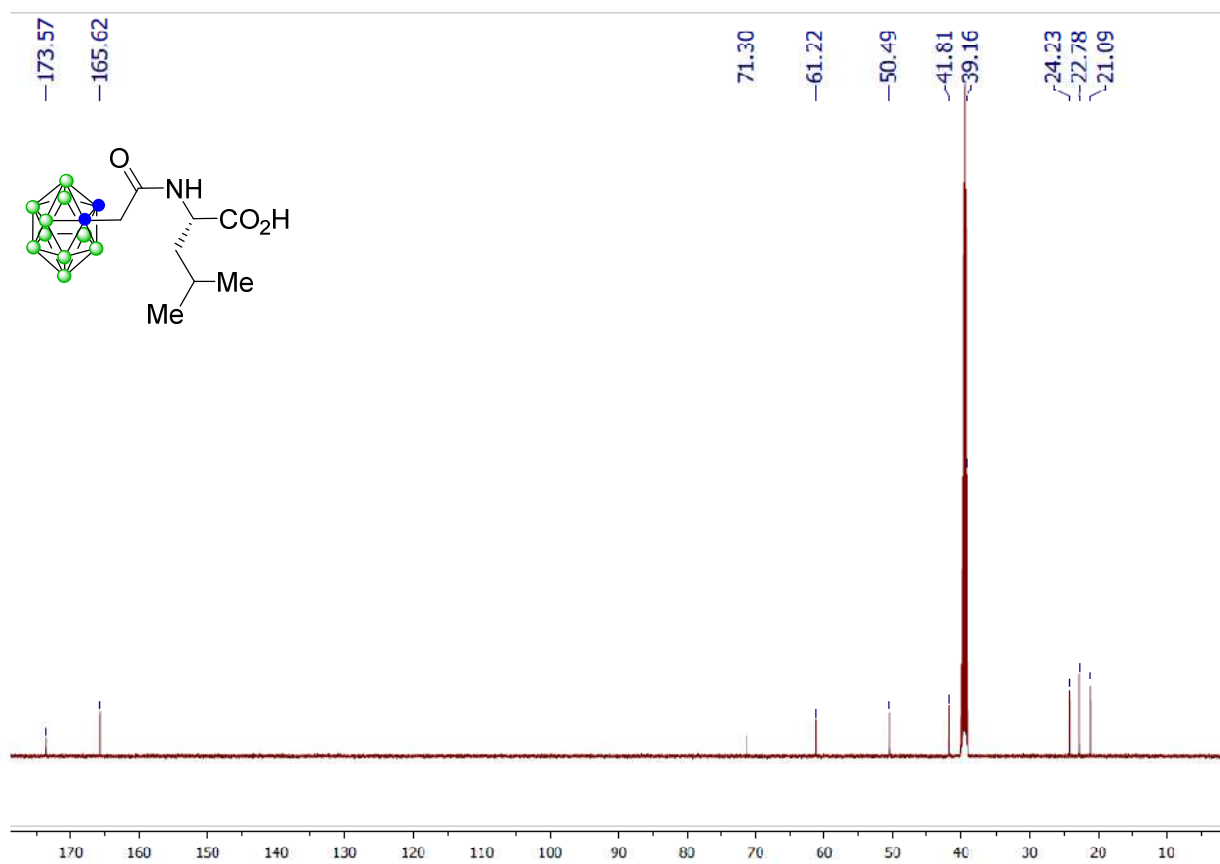

<sup>13</sup>C{<sup>1</sup>H} NMR spectrum of compound **4b** (DMSO-*d*<sub>6</sub>, 25 °C, 126 MHz)

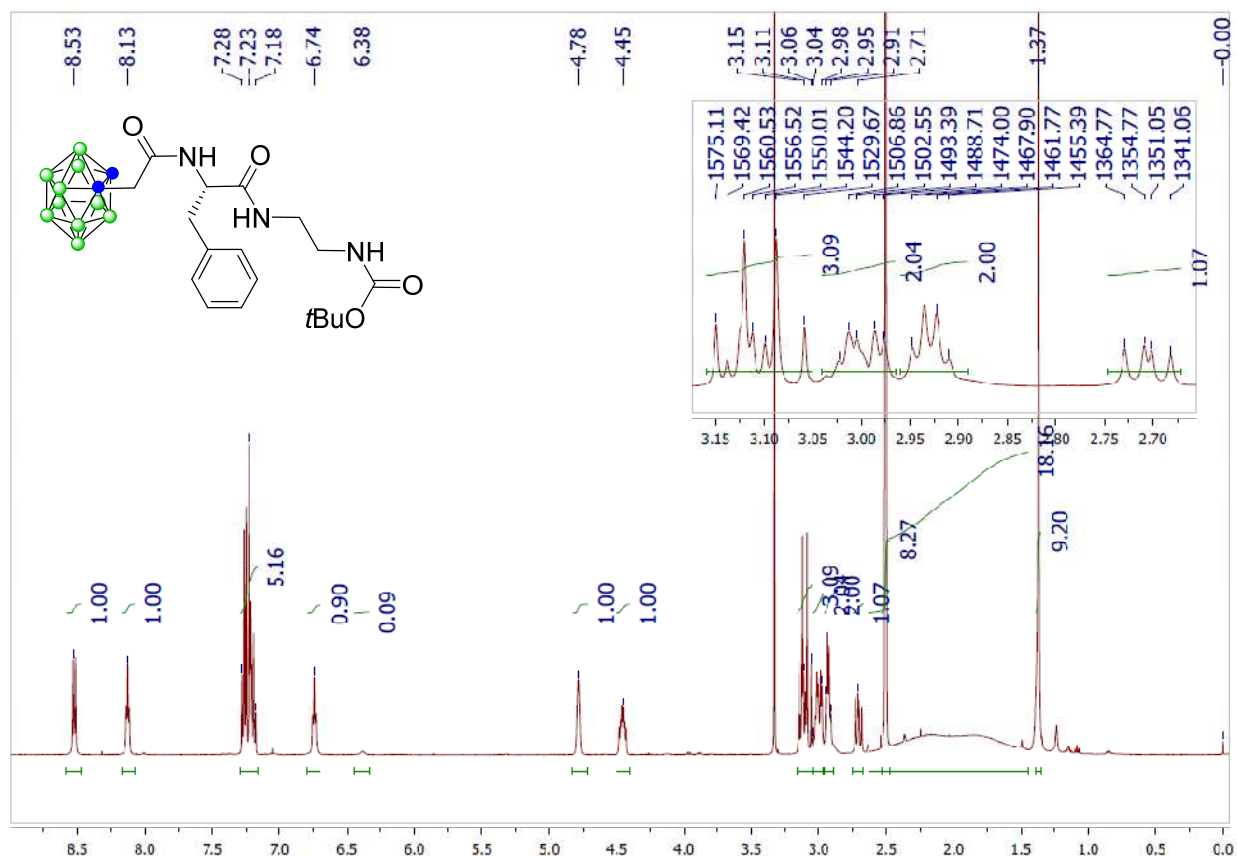

<sup>1</sup>H NMR spectrum of compound 5a (DMSO-*d*<sub>6</sub>, 25 °C, 500 MHz)

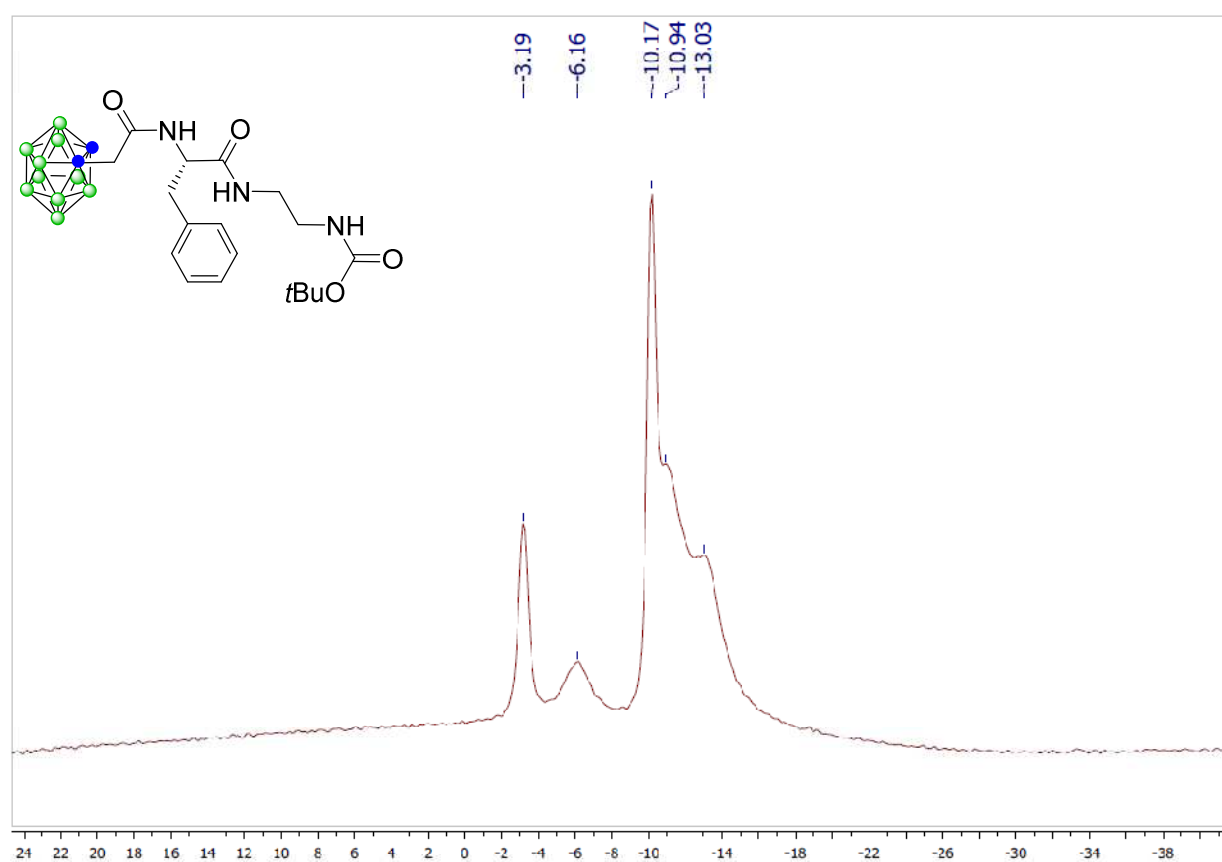

<sup>11</sup>B{<sup>1</sup>H} NMR spectrum of compound 5a (DMSO-*d*<sub>6</sub>, 25 °C, 160 MHz)

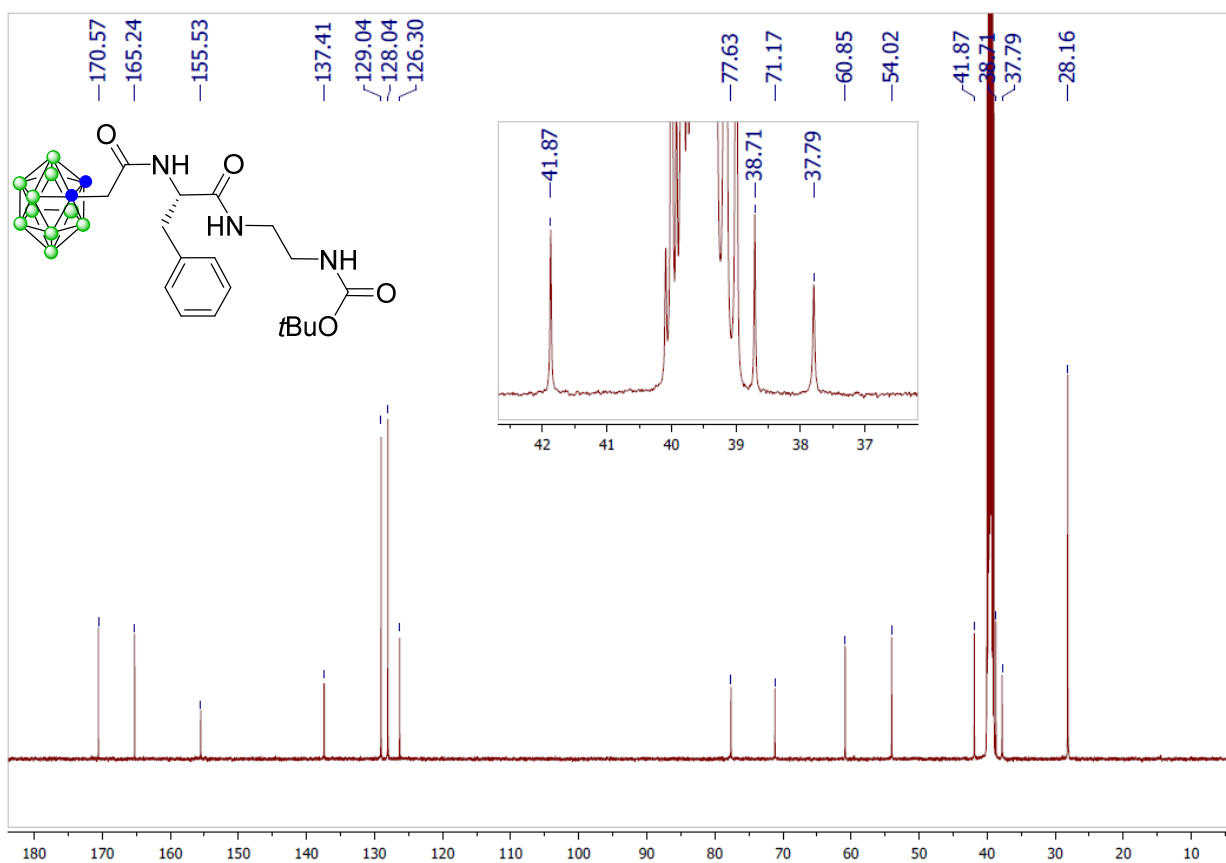

$^{13}\text{C}\{^1\text{H}\}$  NMR spectrum of compound **5a** (DMSO- $d_6$ , 25 °C, 126 MHz)

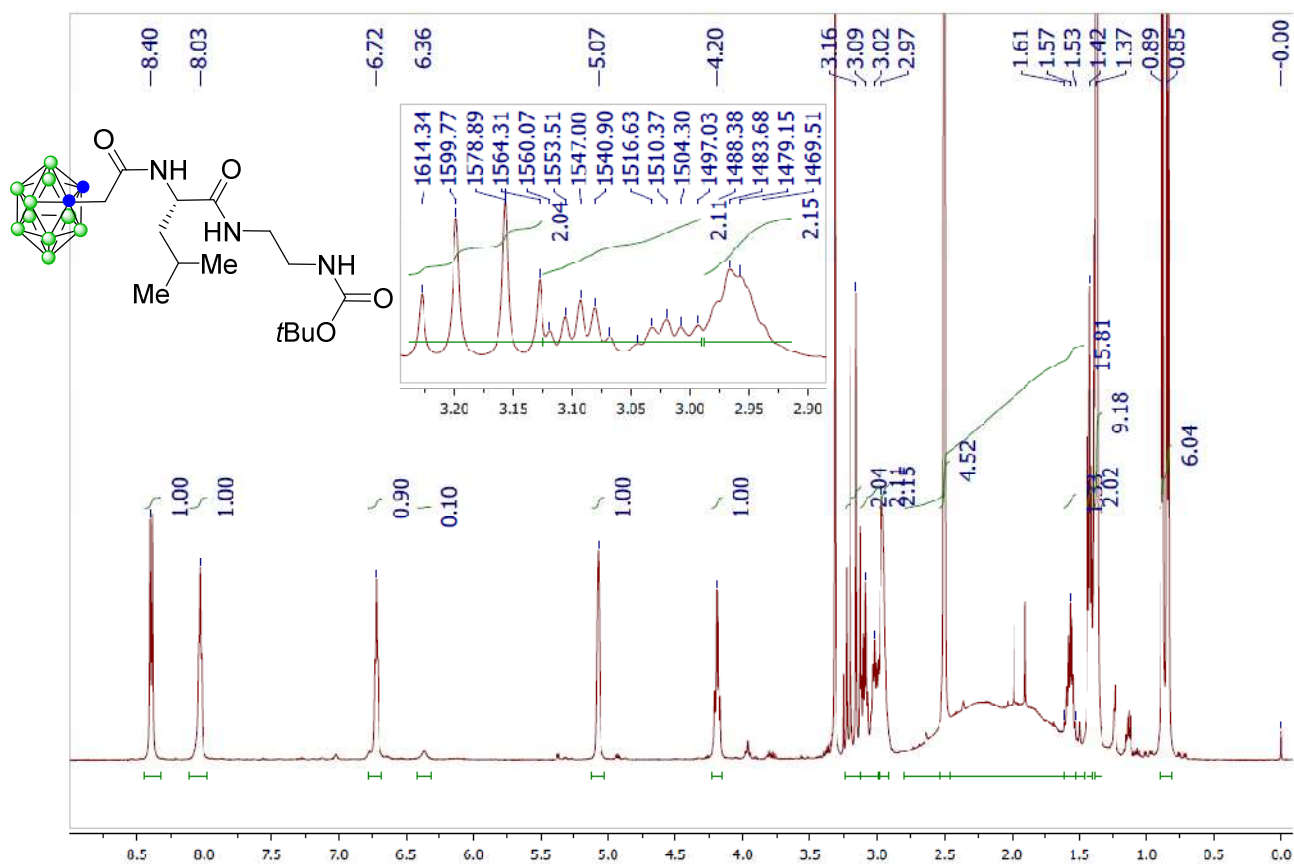

$^1\text{H}$  NMR spectrum of compound **5b** (DMSO- $d_6$ , 25 °C, 500 MHz)

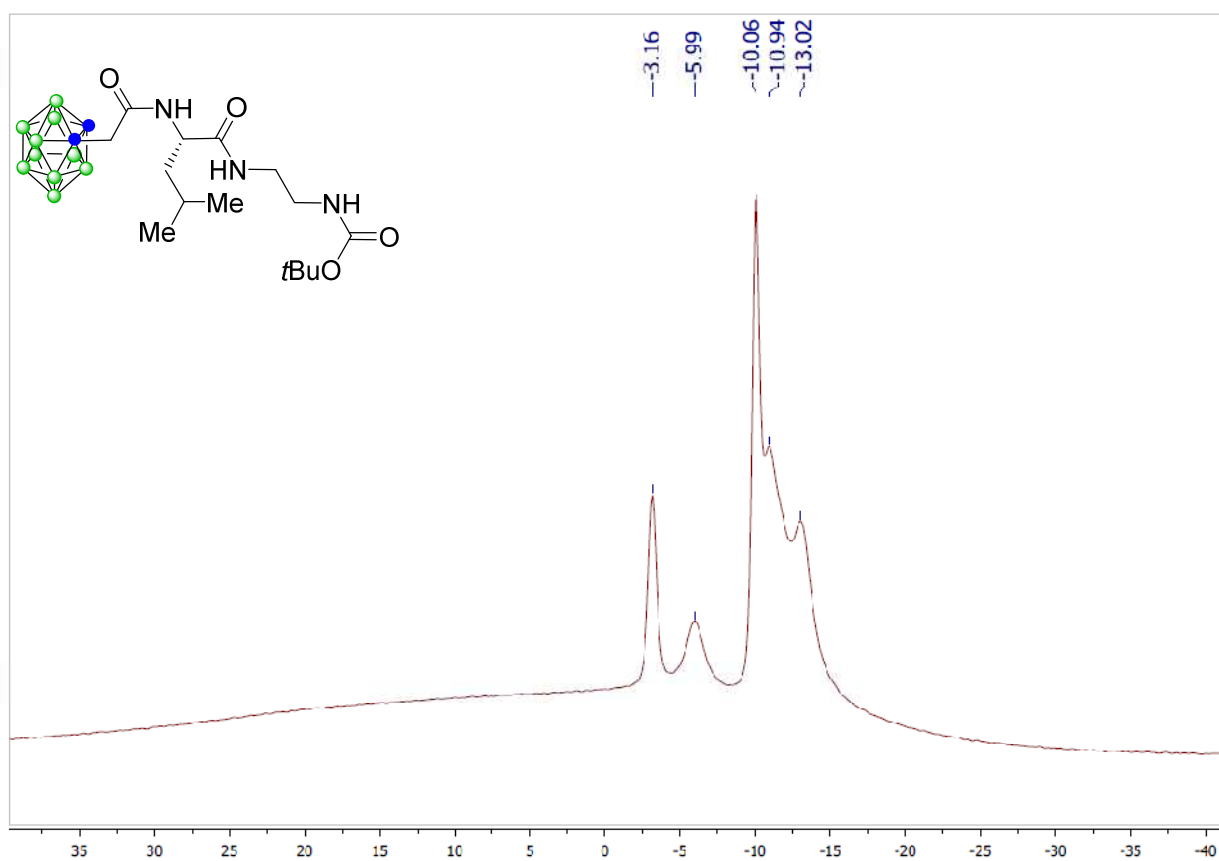

$^{11}\text{B}\{^1\text{H}\}$  NMR spectrum of compound **5b** (DMSO- $d_6$ , 25 °C, 160 MHz)

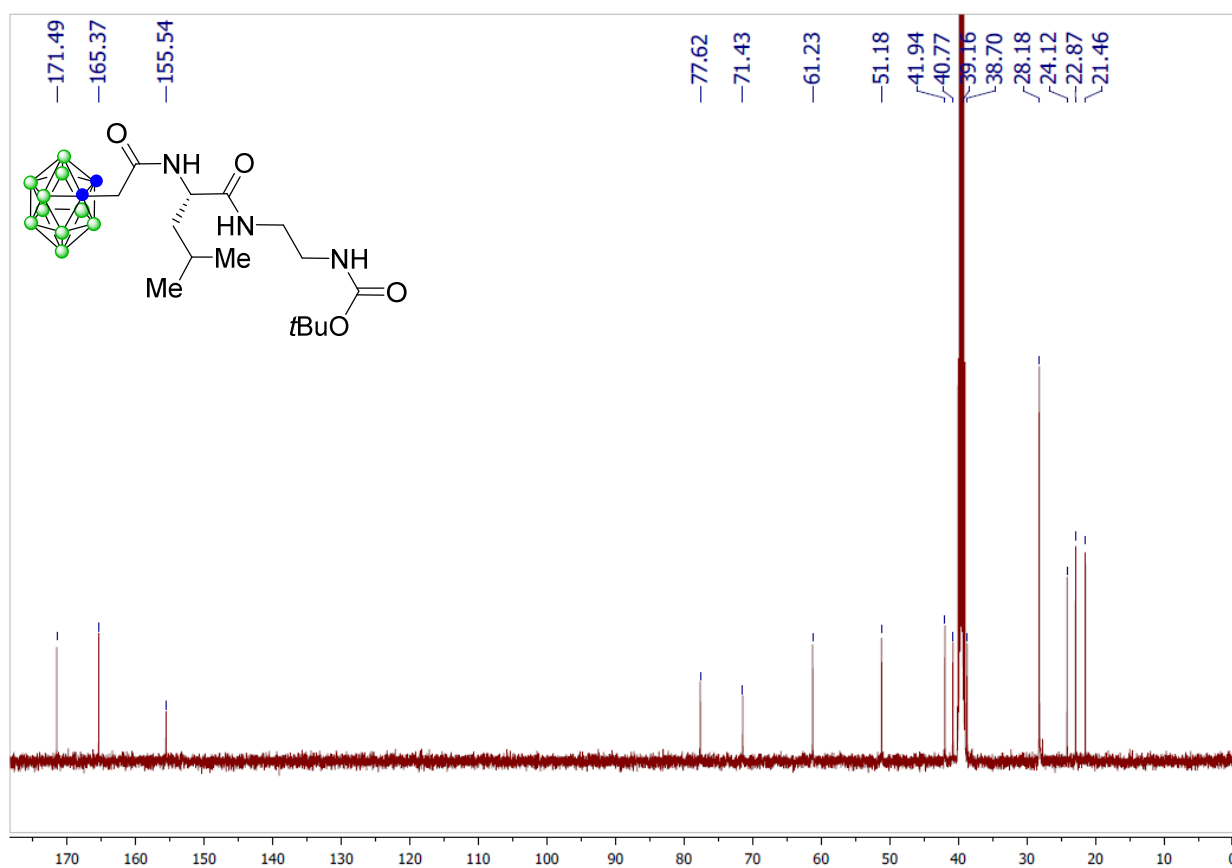

$^{13}\text{C}\{^1\text{H}\}$  NMR spectrum of compound **5b** (DMSO- $d_6$ , 25 °C, 126 MHz)

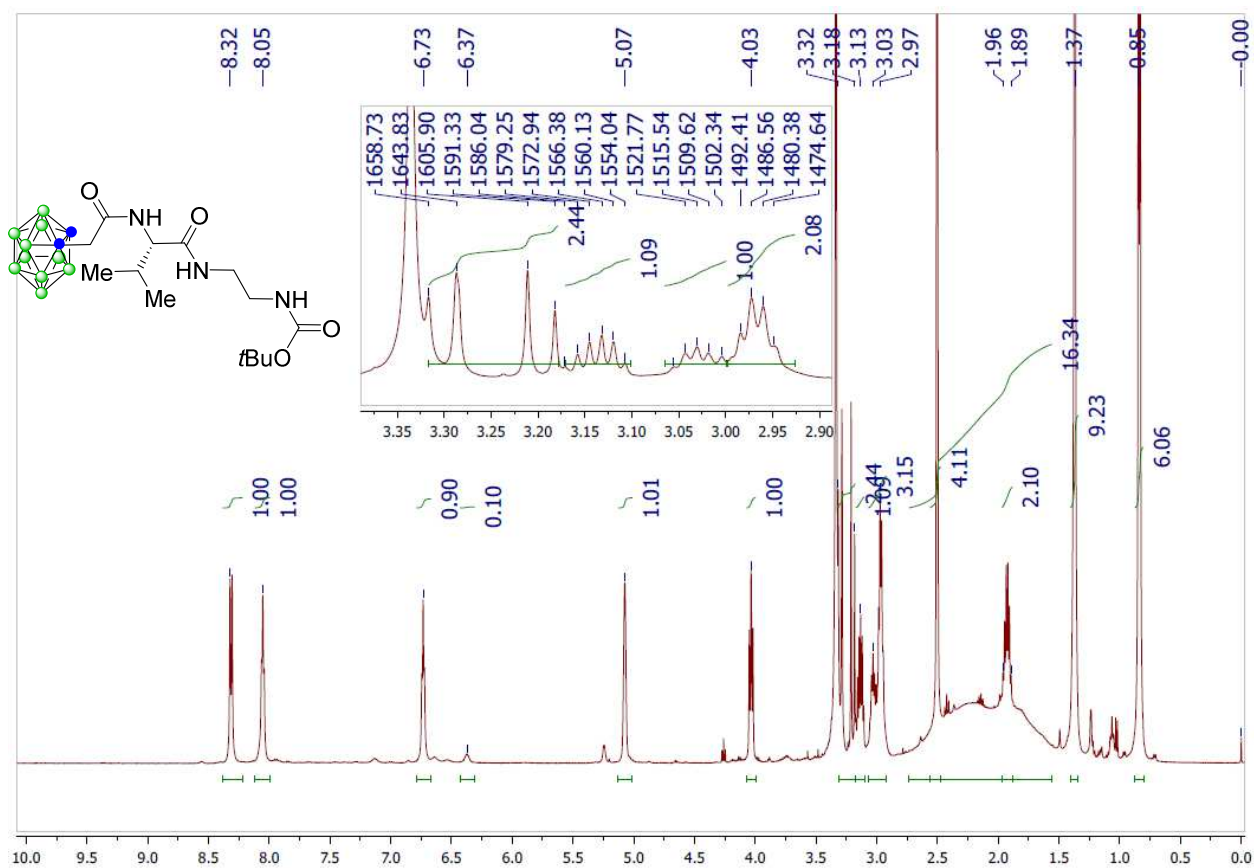

<sup>1</sup>H NMR spectrum of compound 5c (DMSO-*d*<sub>6</sub>, 25 °C, 500 MHz)

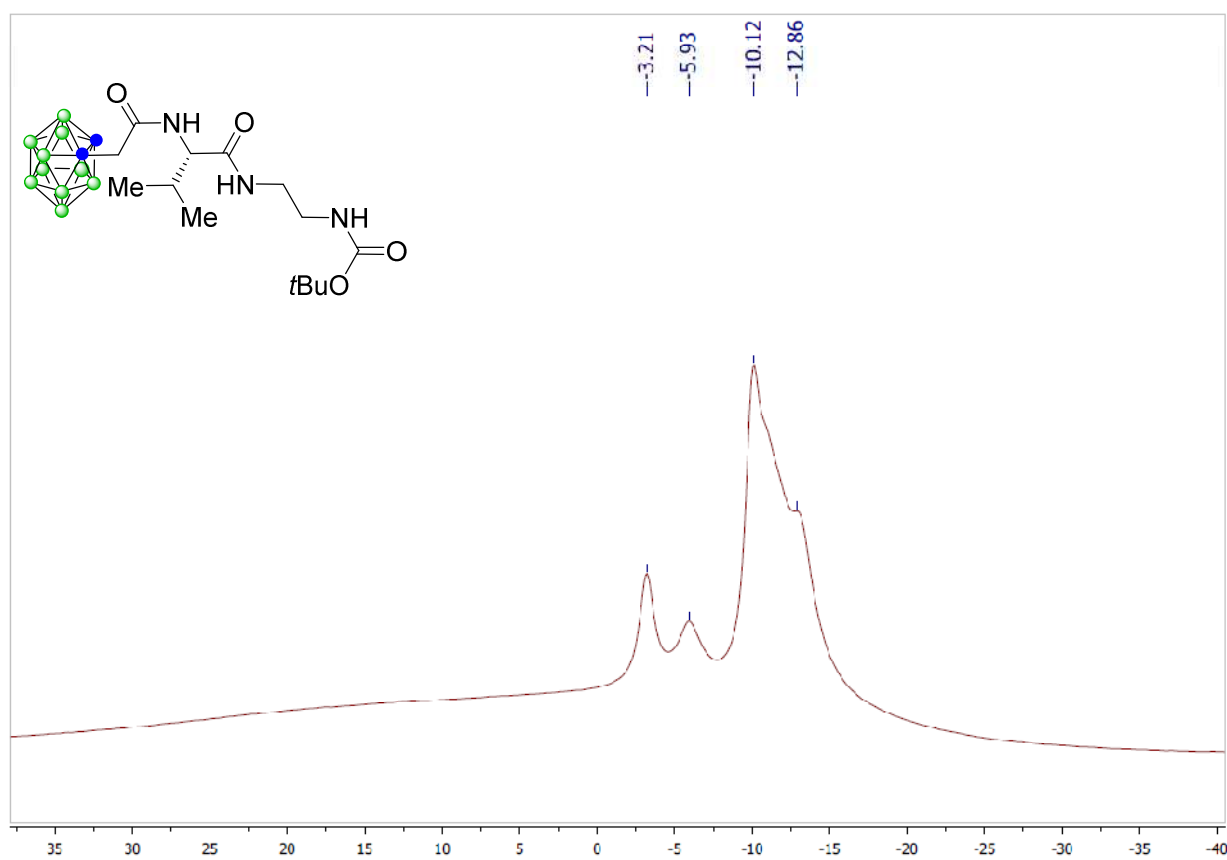

<sup>11</sup>B{<sup>1</sup>H} NMR spectrum of compound 5c (DMSO-*d*<sub>6</sub>, 25 °C, 160 MHz)

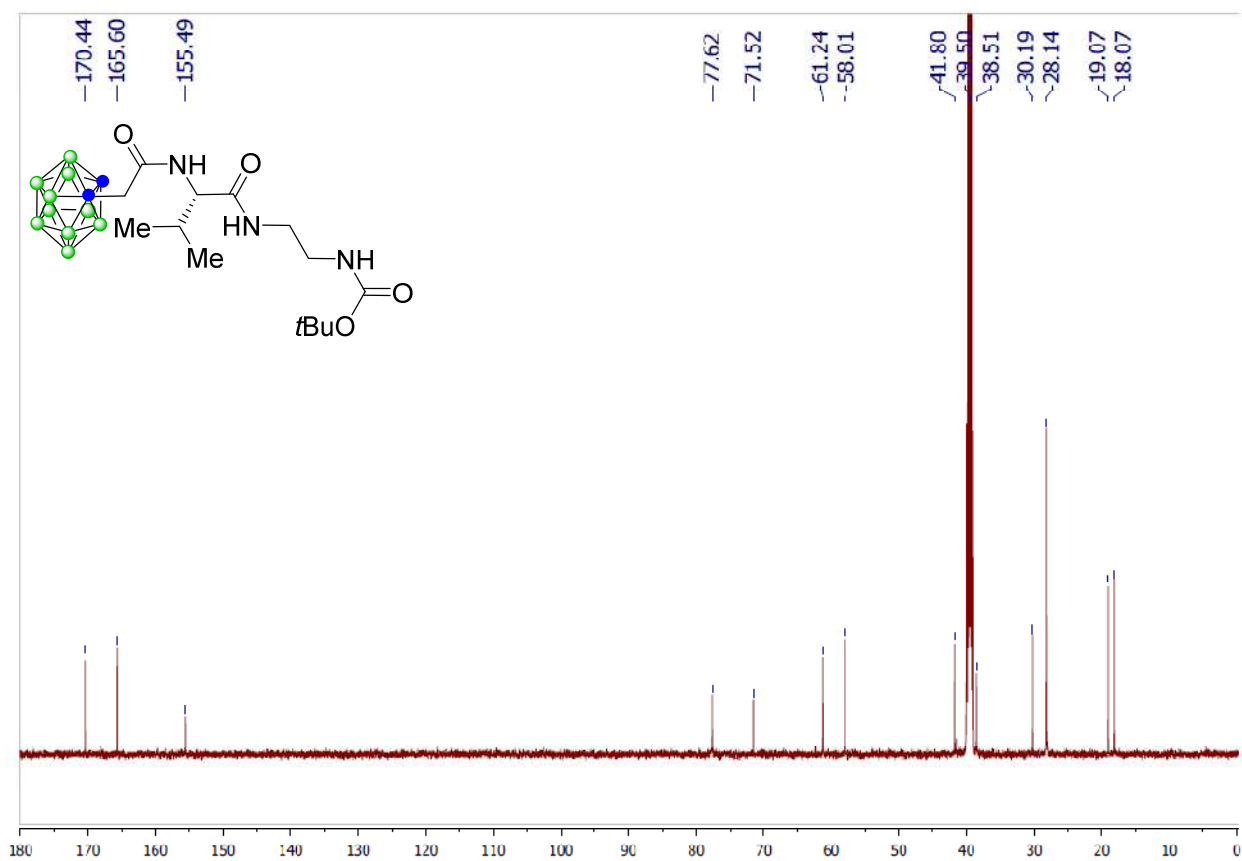

$^{13}\text{C}\{^1\text{H}\}$  NMR spectrum of compound **5c** (DMSO- $d_6$ , 25 °C, 126 MHz)

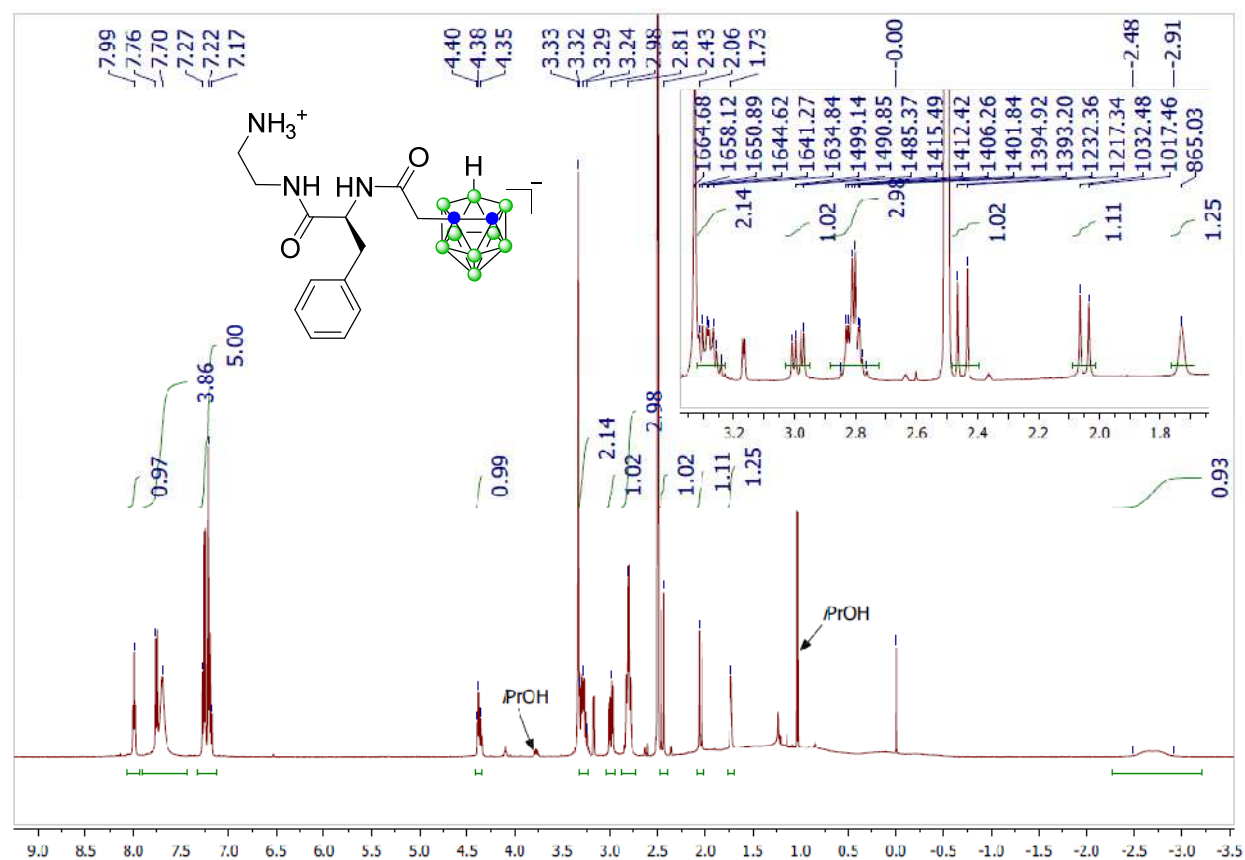

$^1\text{H}$  NMR spectrum of compound **(S,R<sub>p</sub>)-7a** (DMSO- $d_6$ , 25 °C, 500 MHz)

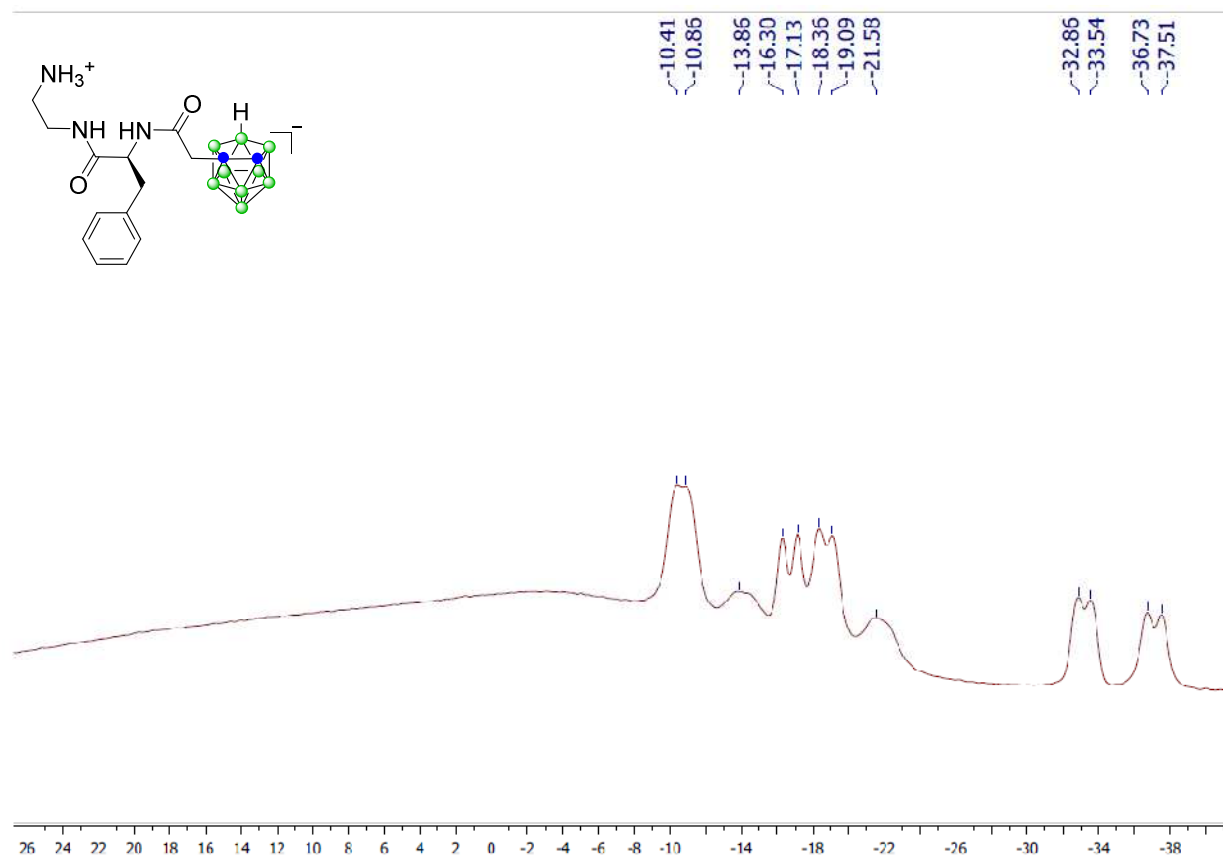

Proton-coupled  $^{11}\text{B}$  NMR spectrum of compound  $(S,R_p)$ -**7a** (DMSO- $d_6$ , 25 °C, 160 MHz)

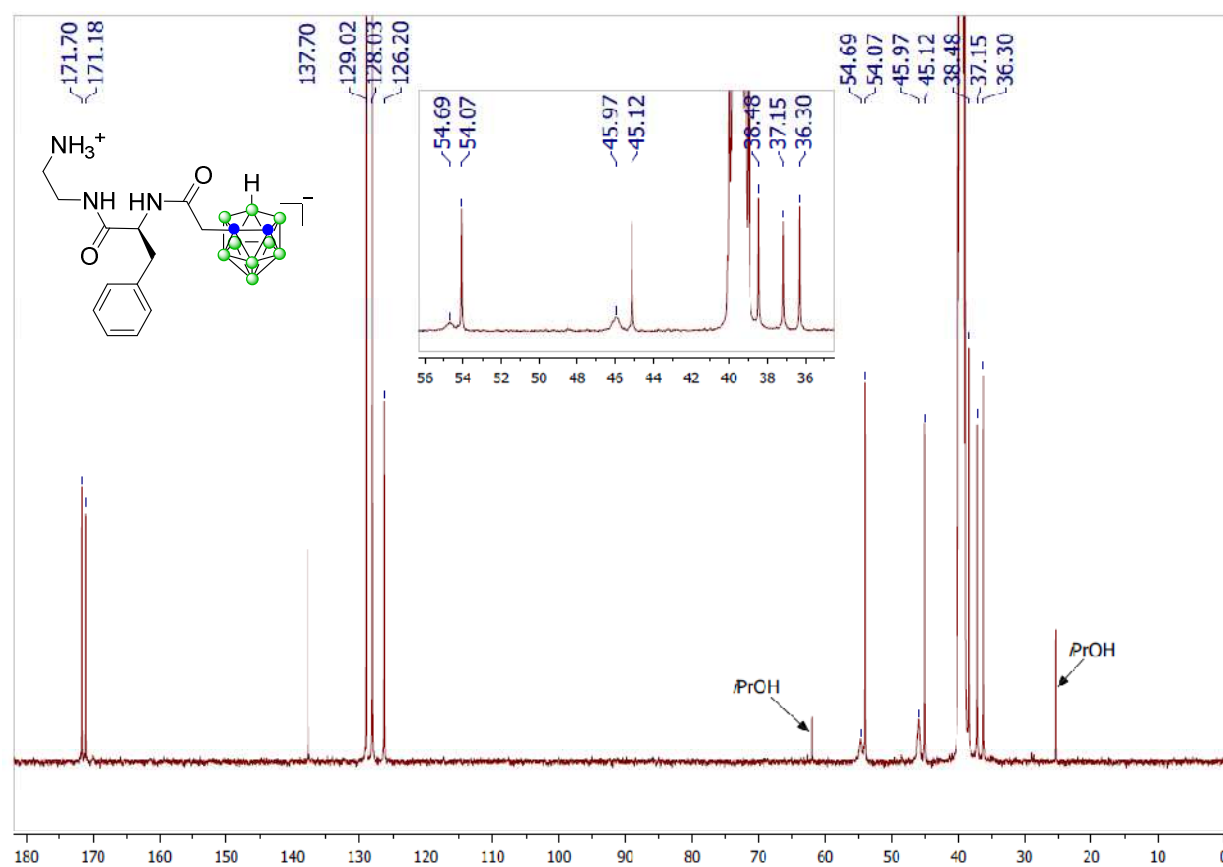

$^{13}\text{C}\{^1\text{H}\}$  NMR spectrum of compound  $(S,R_p)$ -**7a** (DMSO- $d_6$ , 25 °C, 126 MHz)

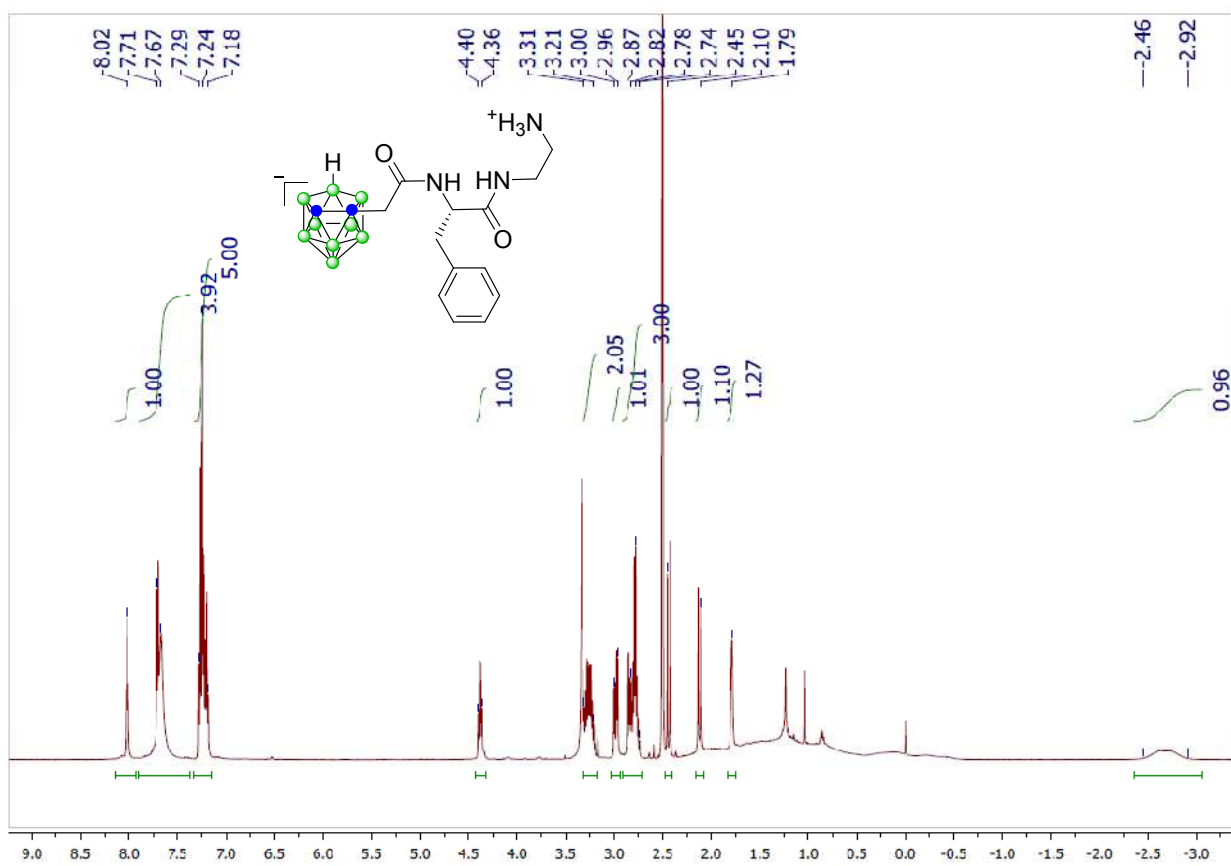

<sup>1</sup>H NMR spectrum of compound (S,S<sub>p</sub>)-7a (DMSO-d<sub>6</sub>, 25 °C, 500 MHz)

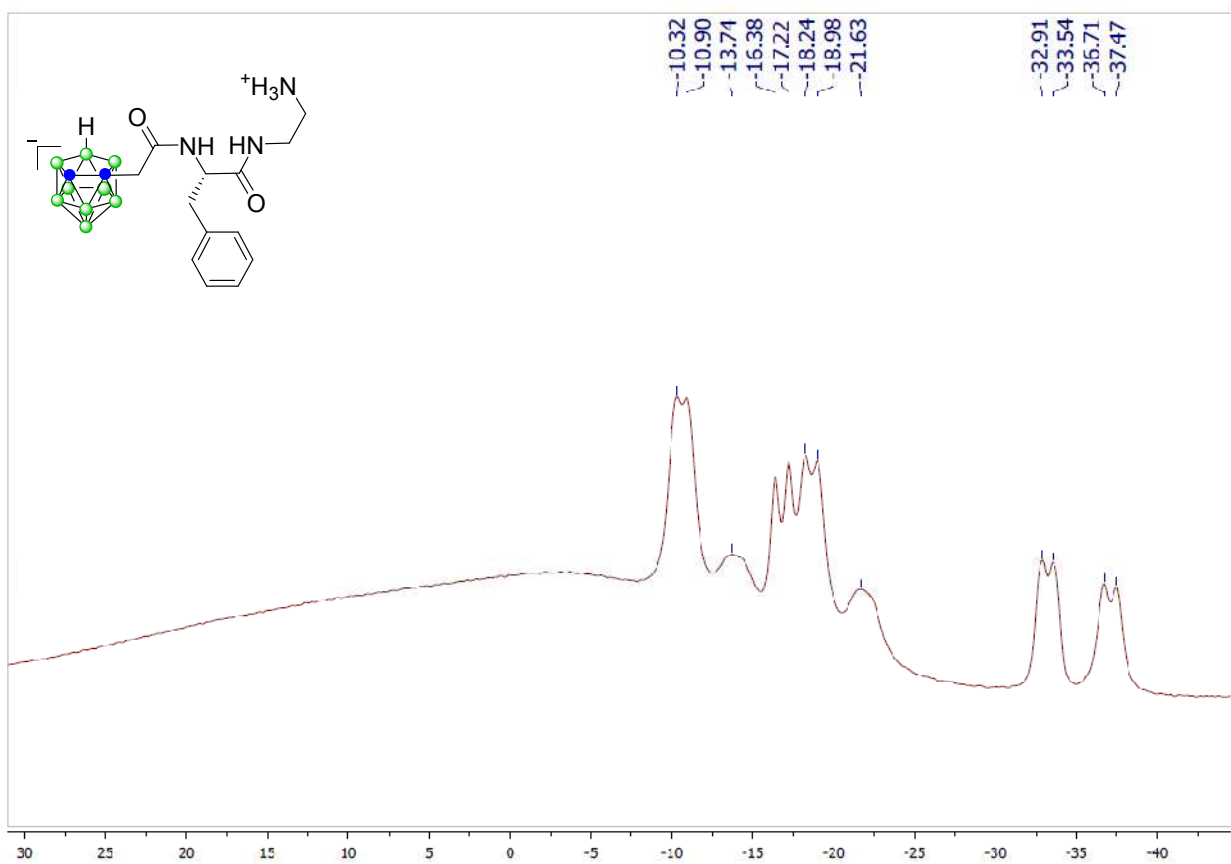

Proton-coupled <sup>11</sup>B NMR spectrum of compound (S,S<sub>p</sub>)-7a (DMSO-d<sub>6</sub>, 25 °C, 160 MHz)



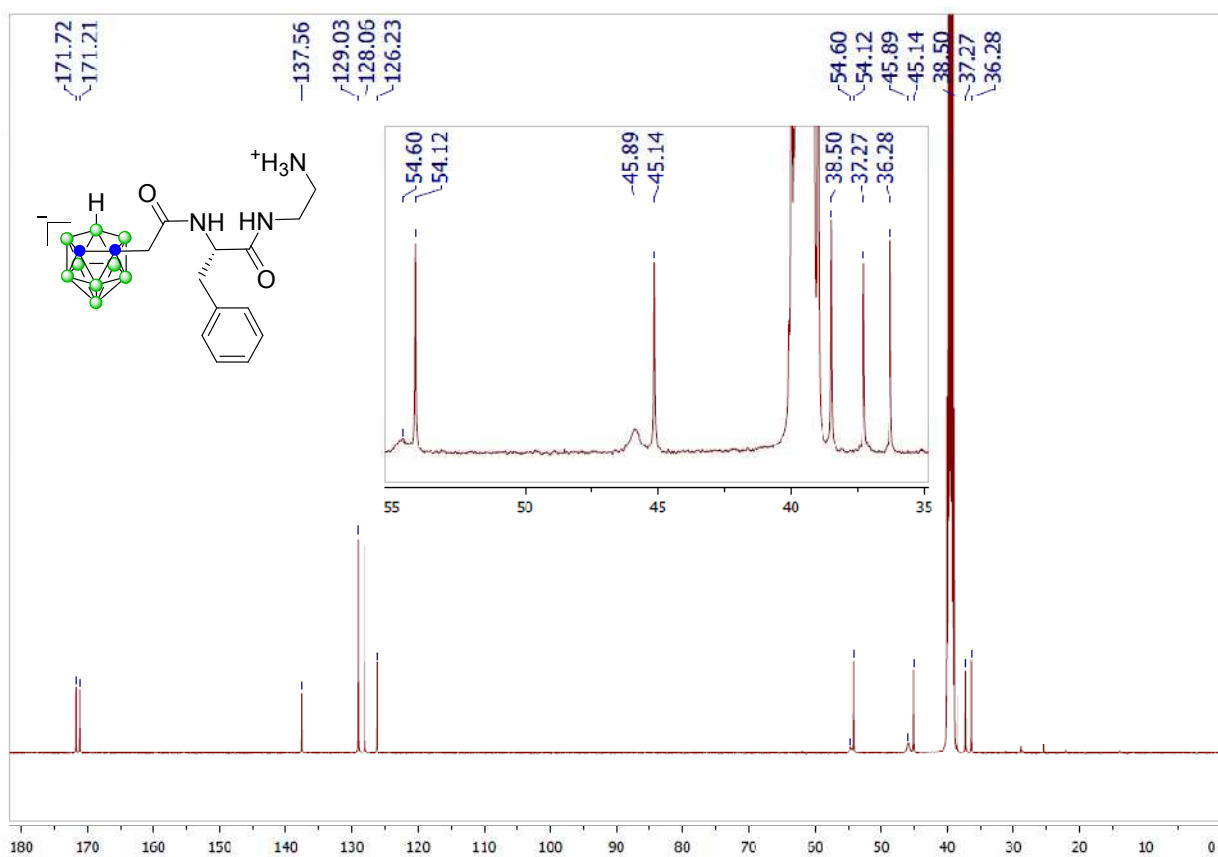

$^{13}\text{C}\{^1\text{H}\}$  NMR spectrum of compound (*S,S,P*)-**7a** (DMSO-*d*<sub>6</sub>, 25 °C, 126 MHz)

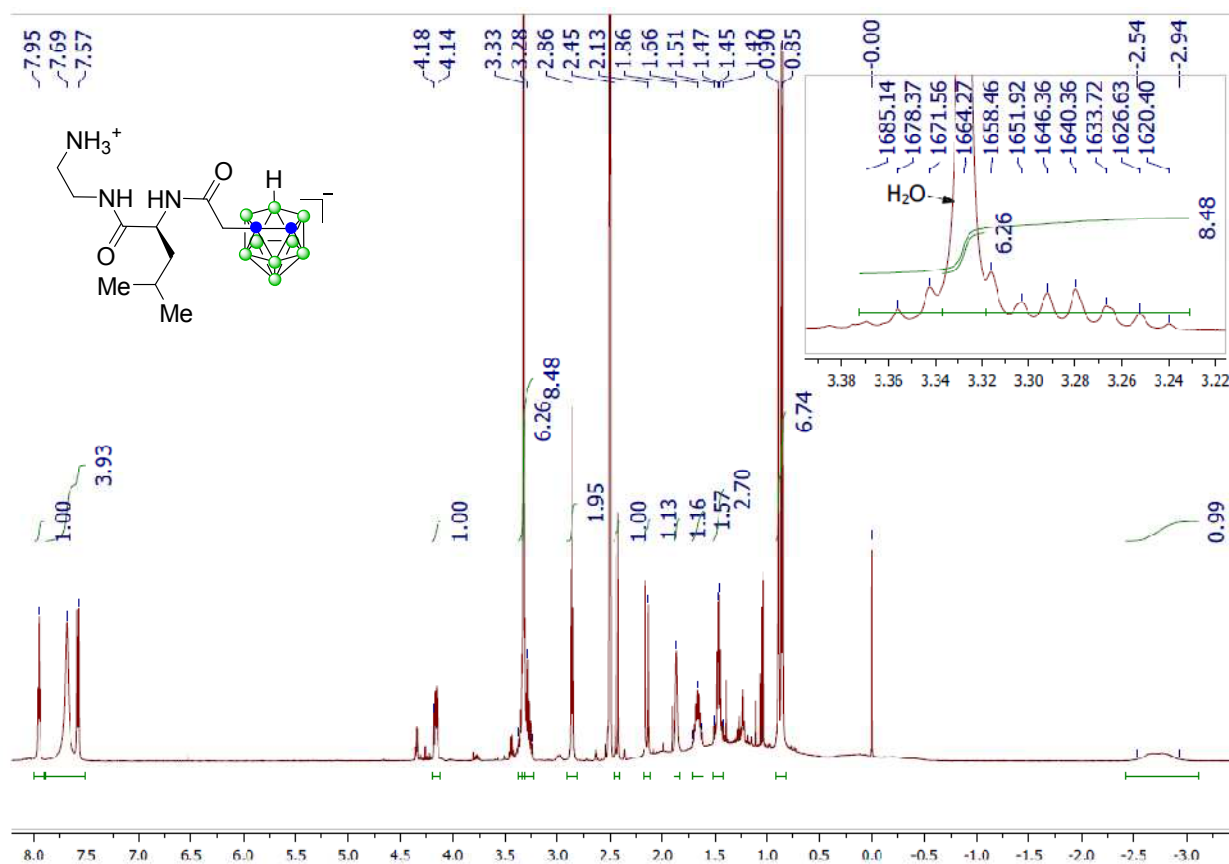

$^1\text{H}$  NMR spectrum of compound (*S,R,P*)-**7b** (DMSO-*d*<sub>6</sub>, 25 °C, 500 MHz)

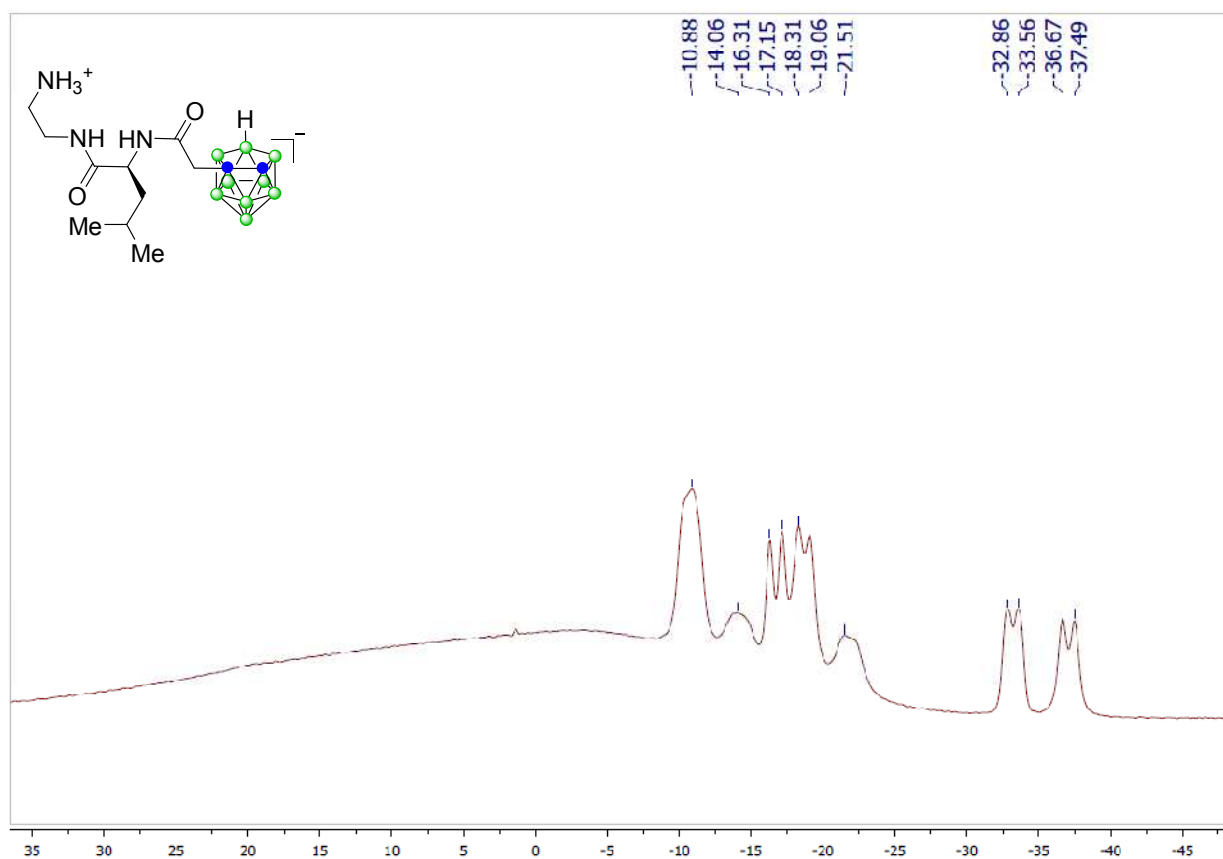

Proton-coupled  $^{11}\text{B}$  NMR spectrum of compound  $(S,R_p)$ -**7b** (DMSO- $d_6$ , 25 °C, 160 MHz)

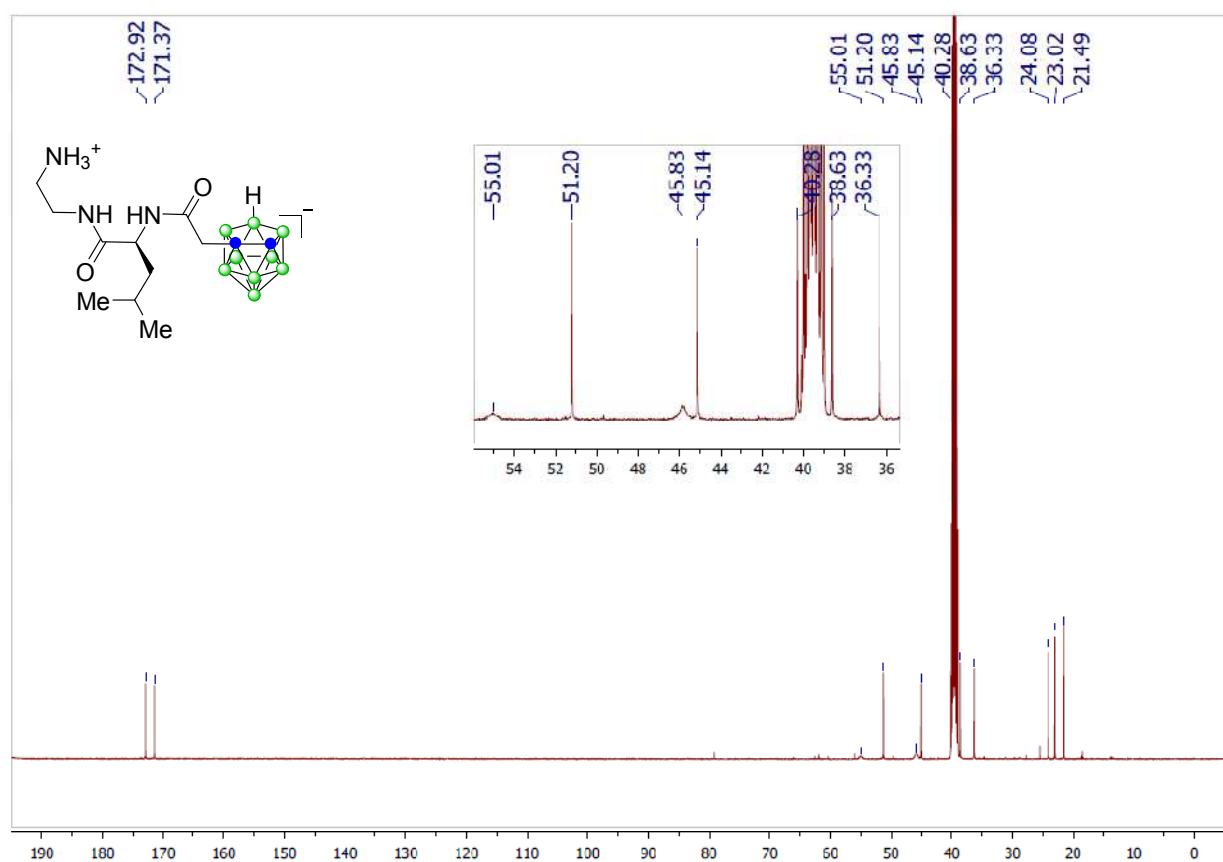

$^{13}\text{C}\{^1\text{H}\}$  NMR spectrum of compound  $(S,R_p)$ -**7b** (DMSO- $d_6$ , 25 °C, 126 MHz)

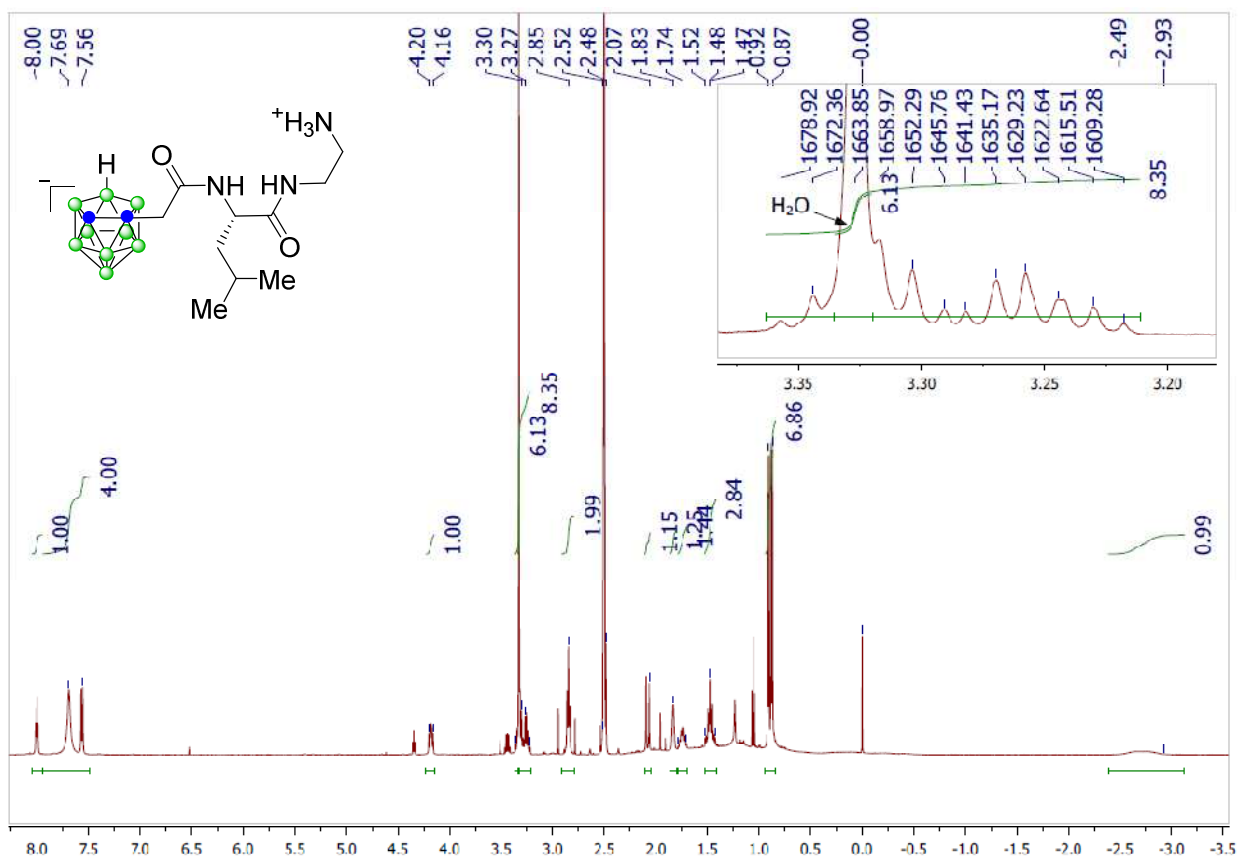

<sup>1</sup>H NMR spectrum of compound (*S,S*)-**7b** (DMSO-*d*<sub>6</sub>, 25 °C, 500 MHz)

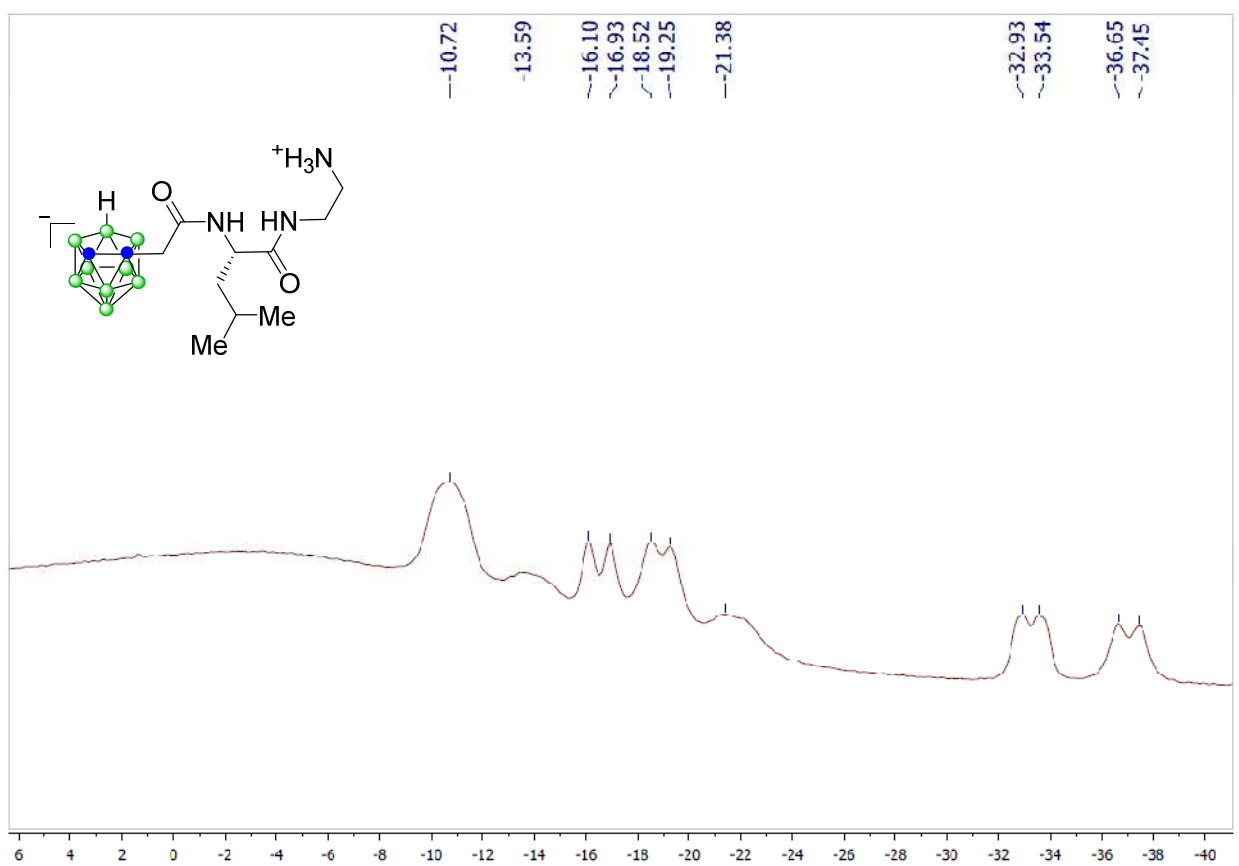

Proton-coupled <sup>11</sup>B NMR spectrum of compound (*S,S*)-**7b** (DMSO-*d*<sub>6</sub>, 25 °C, 160 MHz)

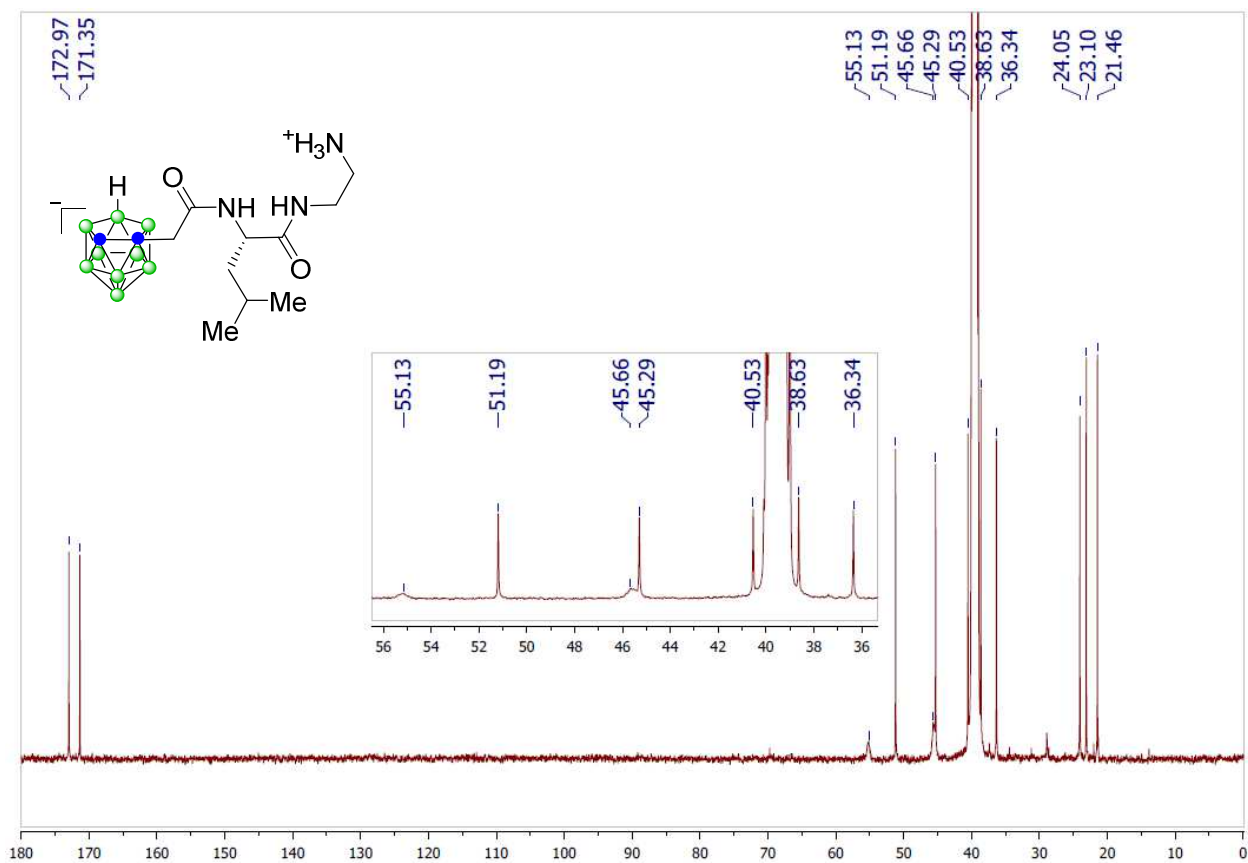

$^{13}\text{C}\{^1\text{H}\}$  NMR spectrum of compound  $(S,S_P)$ -**7b** (DMSO- $d_6$ , 25 °C, 126 MHz)

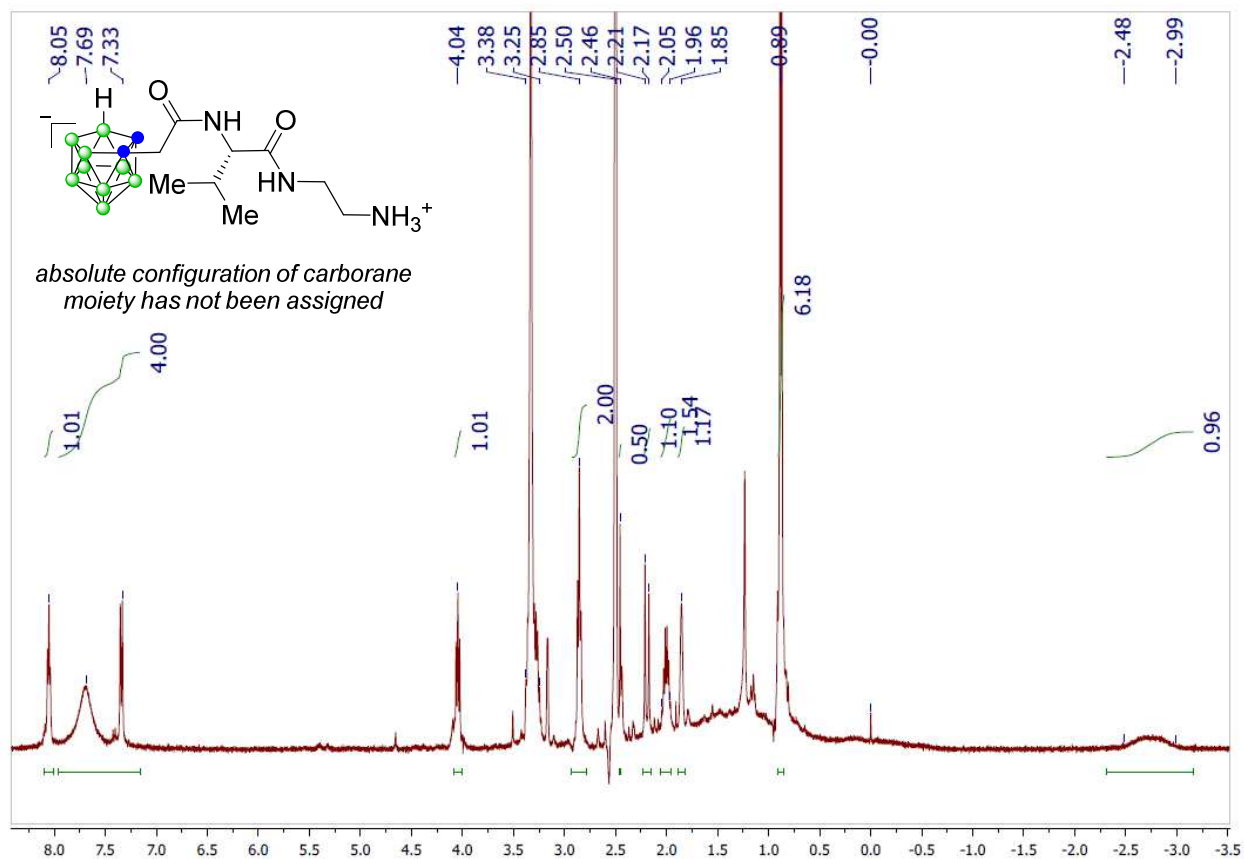

$^1\text{H}$  NMR spectrum of compound **7c** (*diastereomer I*) (DMSO- $d_6$ , 25 °C, 500 MHz)

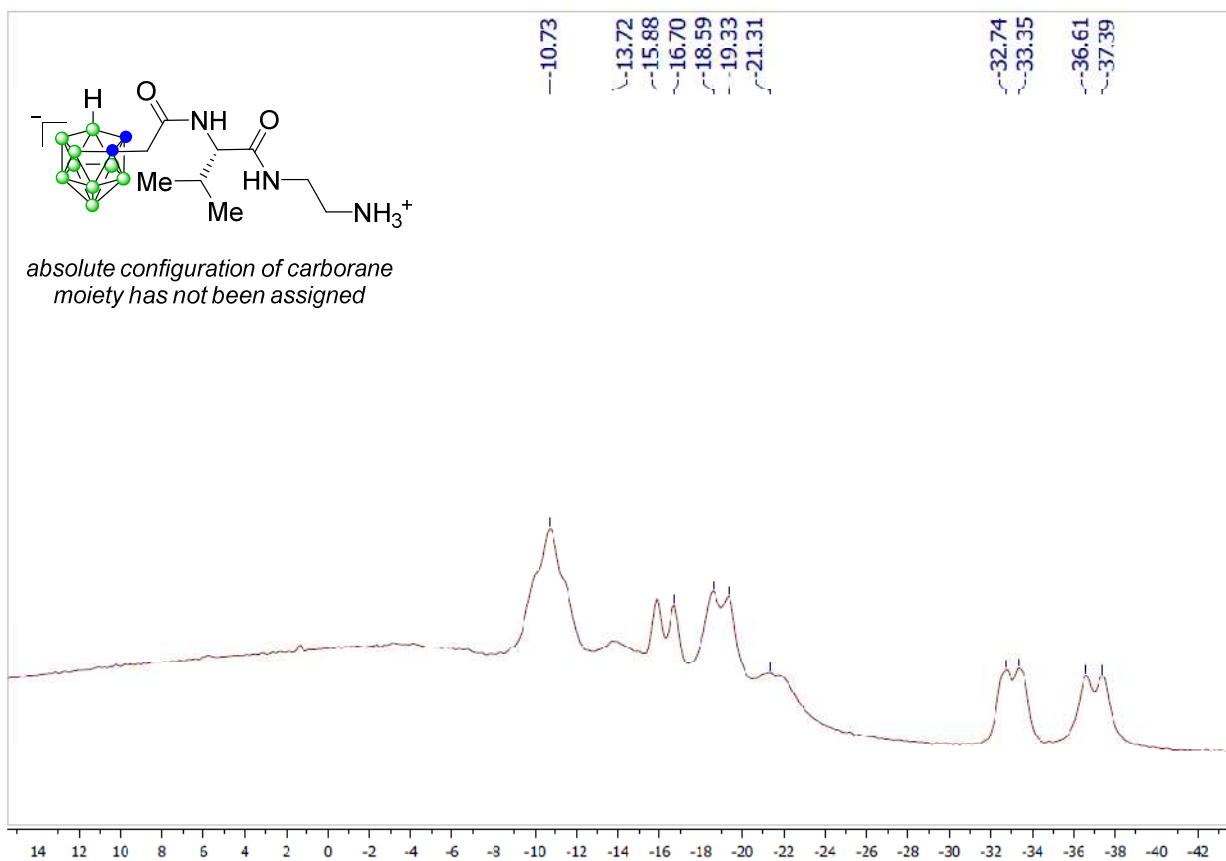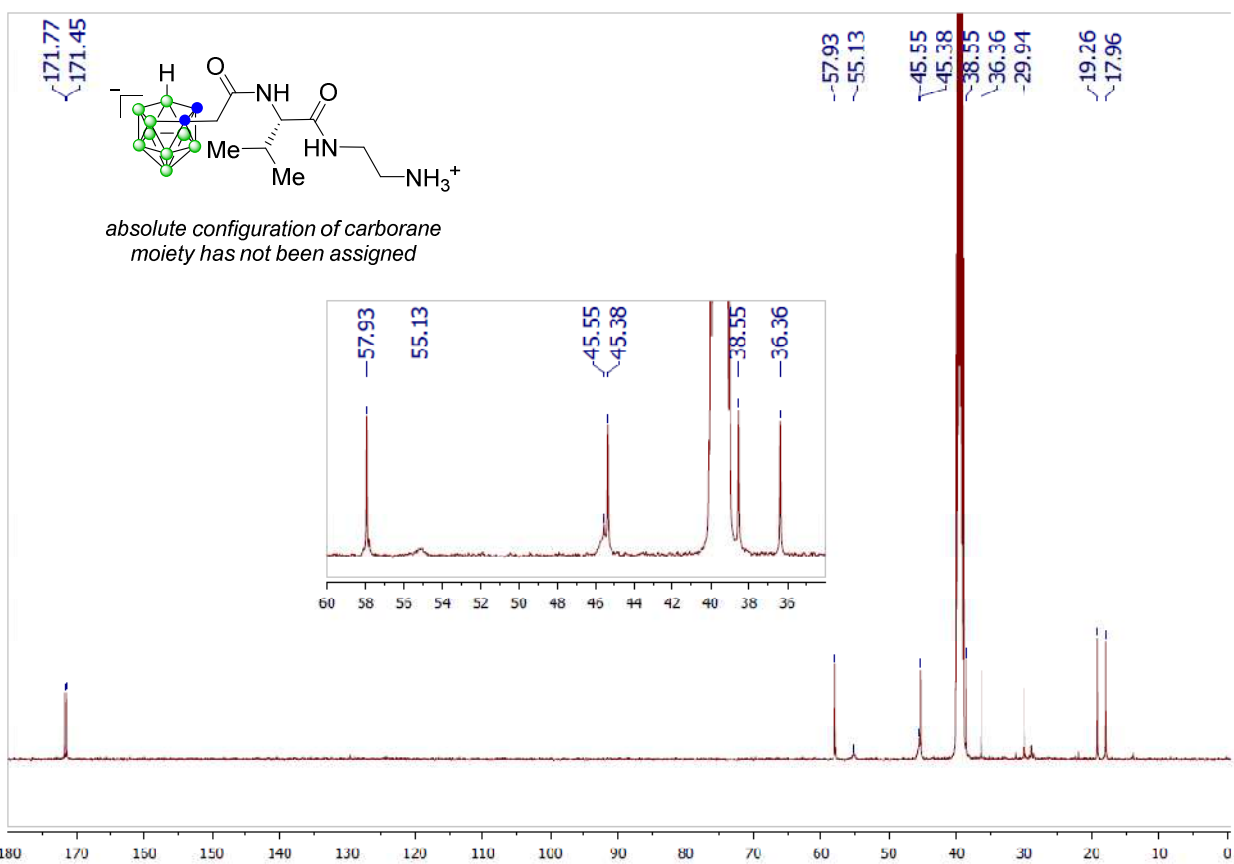

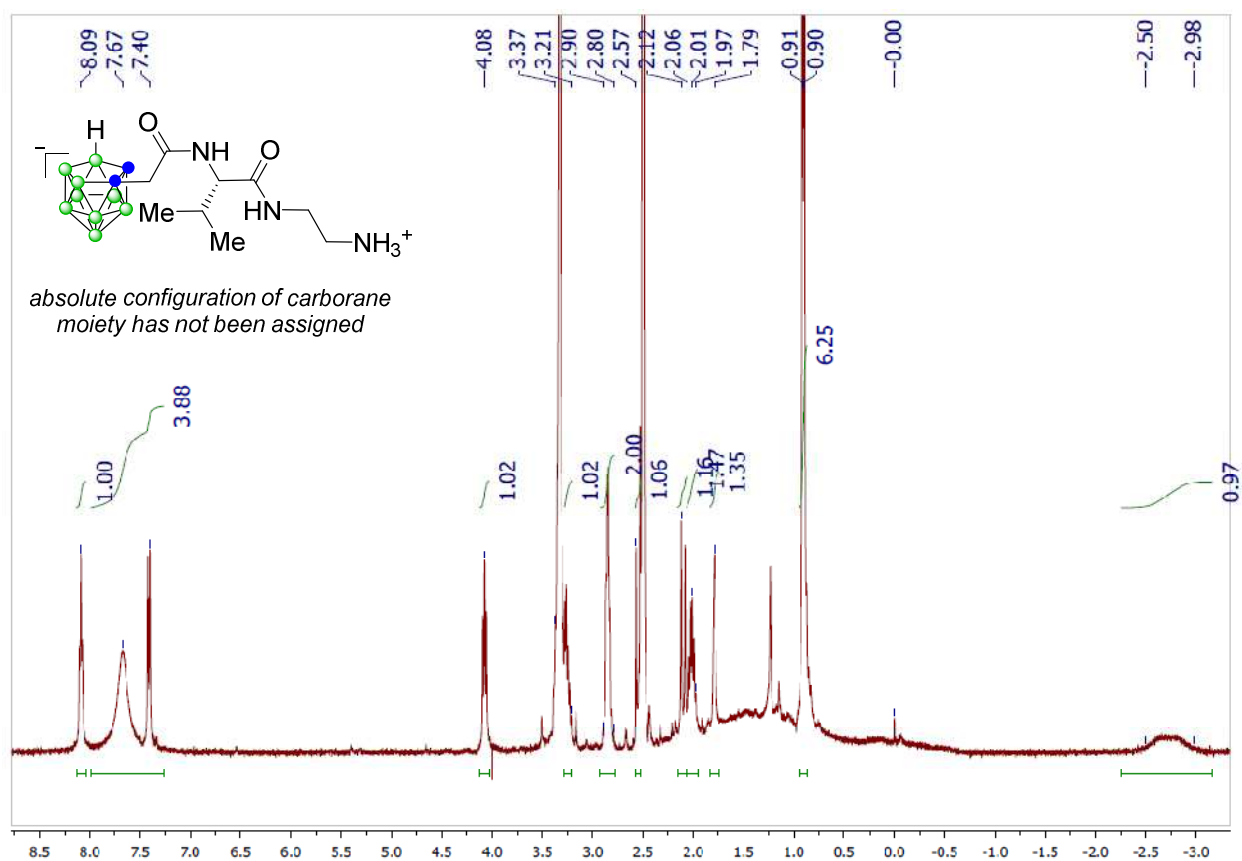

<sup>1</sup>H NMR spectrum of compound **7c** (*diastereomer II*) (DMSO-d<sub>6</sub>, 25 °C, 500 MHz)

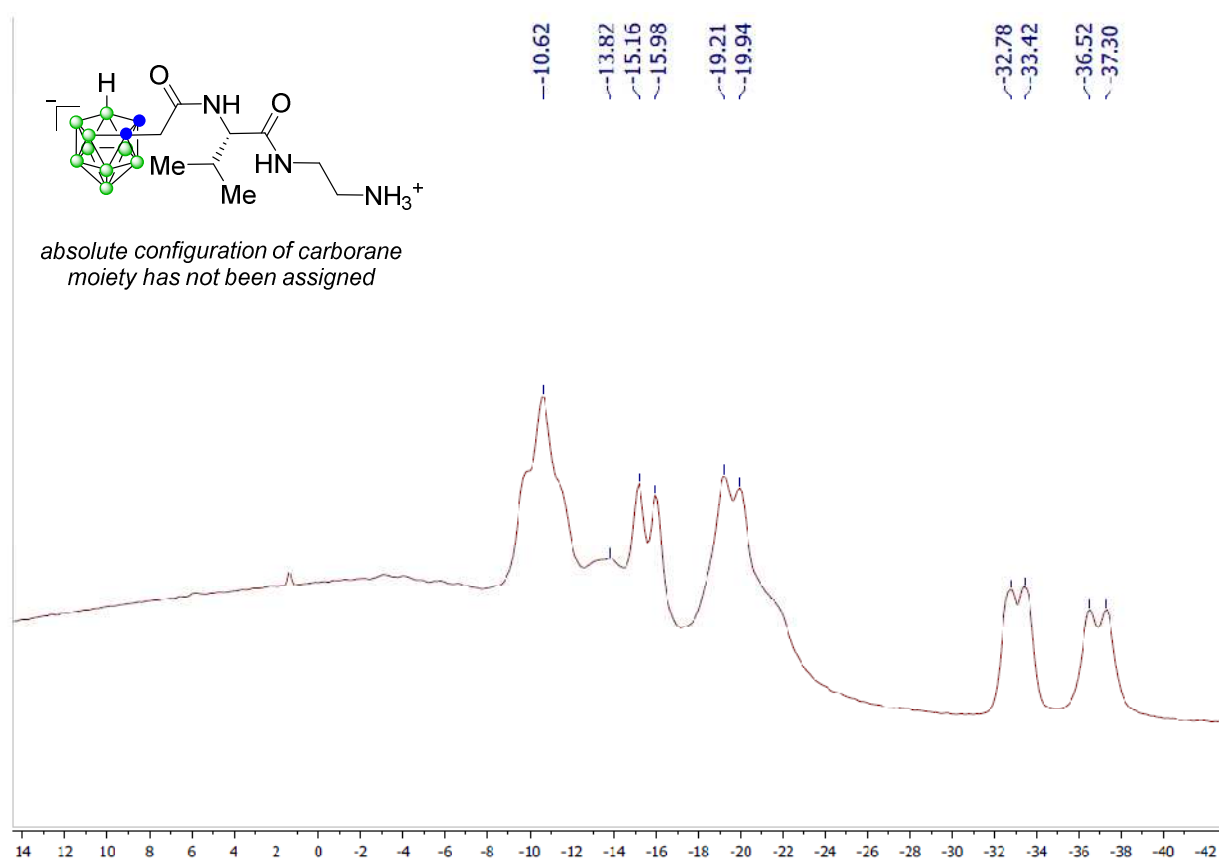

Proton-coupled <sup>11</sup>B NMR spectrum of compound **7c** (*diastereomer II*) (DMSO-d<sub>6</sub>, 25 °C, 160 MHz)

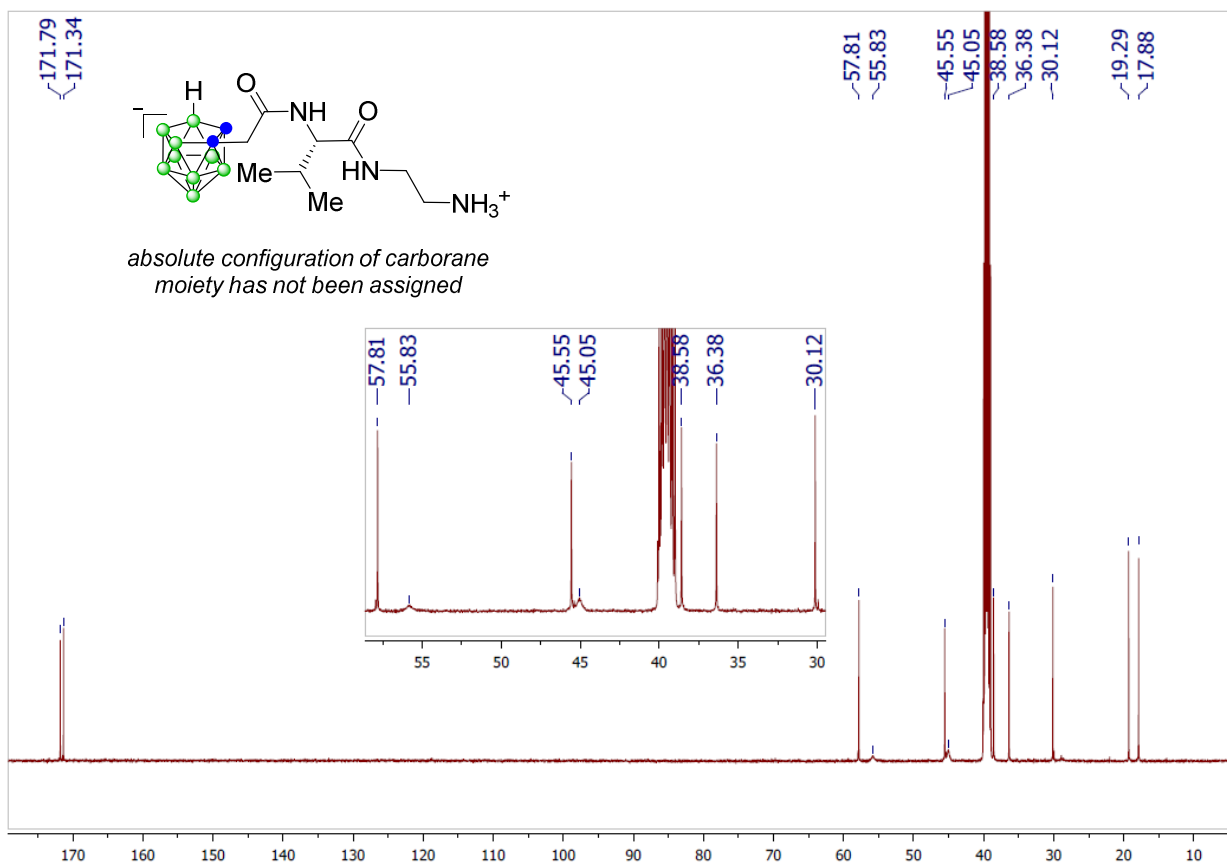

$^{13}\text{C}\{^1\text{H}\}$  NMR spectrum of compound **7c** (*diastereomer II*) (DMSO- $d_6$ , 25 °C, 126 MHz)

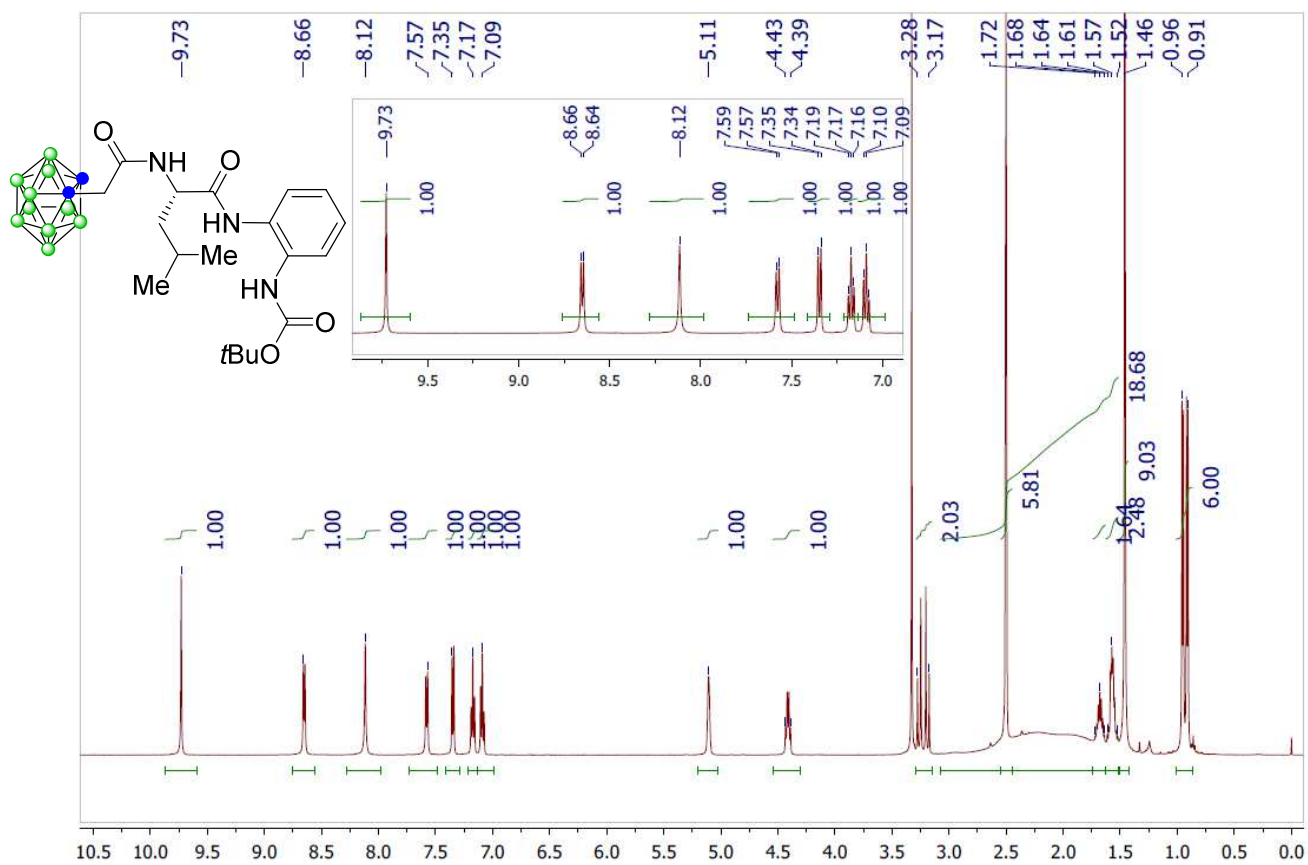

$^1\text{H}$  NMR spectrum of compound **8** (DMSO- $d_6$ , 25 °C, 500 MHz)

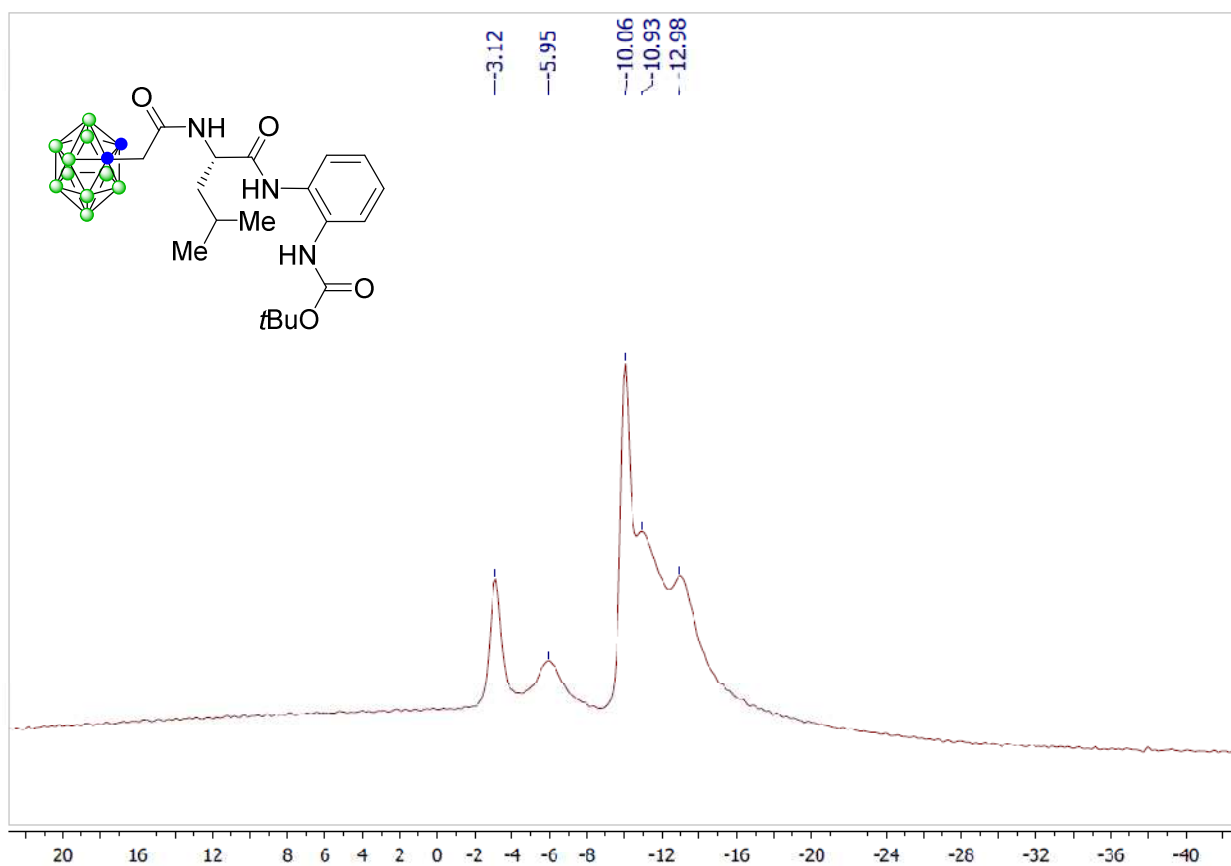

$^{11}\text{B}\{^1\text{H}\}$  NMR spectrum of compound **8** (DMSO- $d_6$ , 25 °C, 160 MHz)

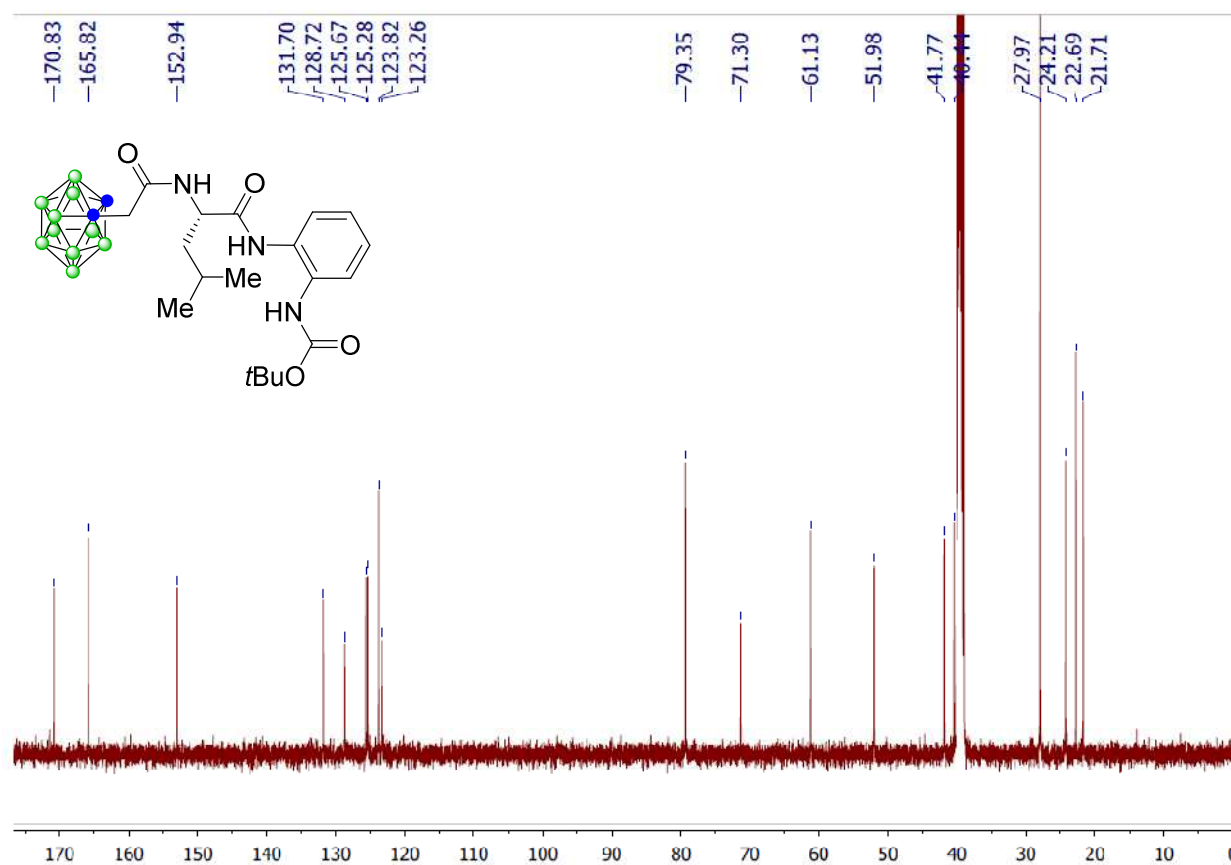

$^{13}\text{C}\{^1\text{H}\}$  NMR spectrum of compound **8** (DMSO- $d_6$ , 25 °C, 126 MHz)



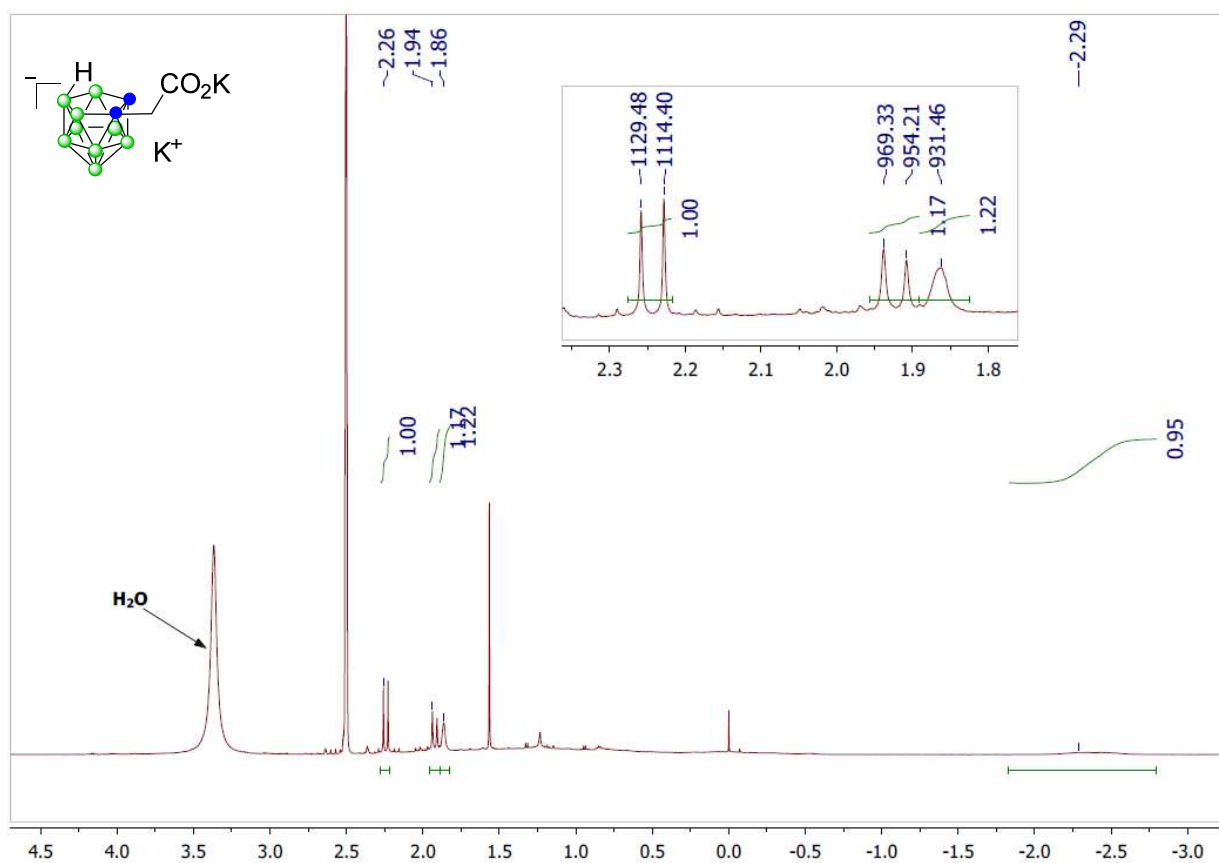

<sup>1</sup>H NMR spectrum of compound **1-K** (DMSO-*d*<sub>6</sub>, 25 °C, 500 MHz)

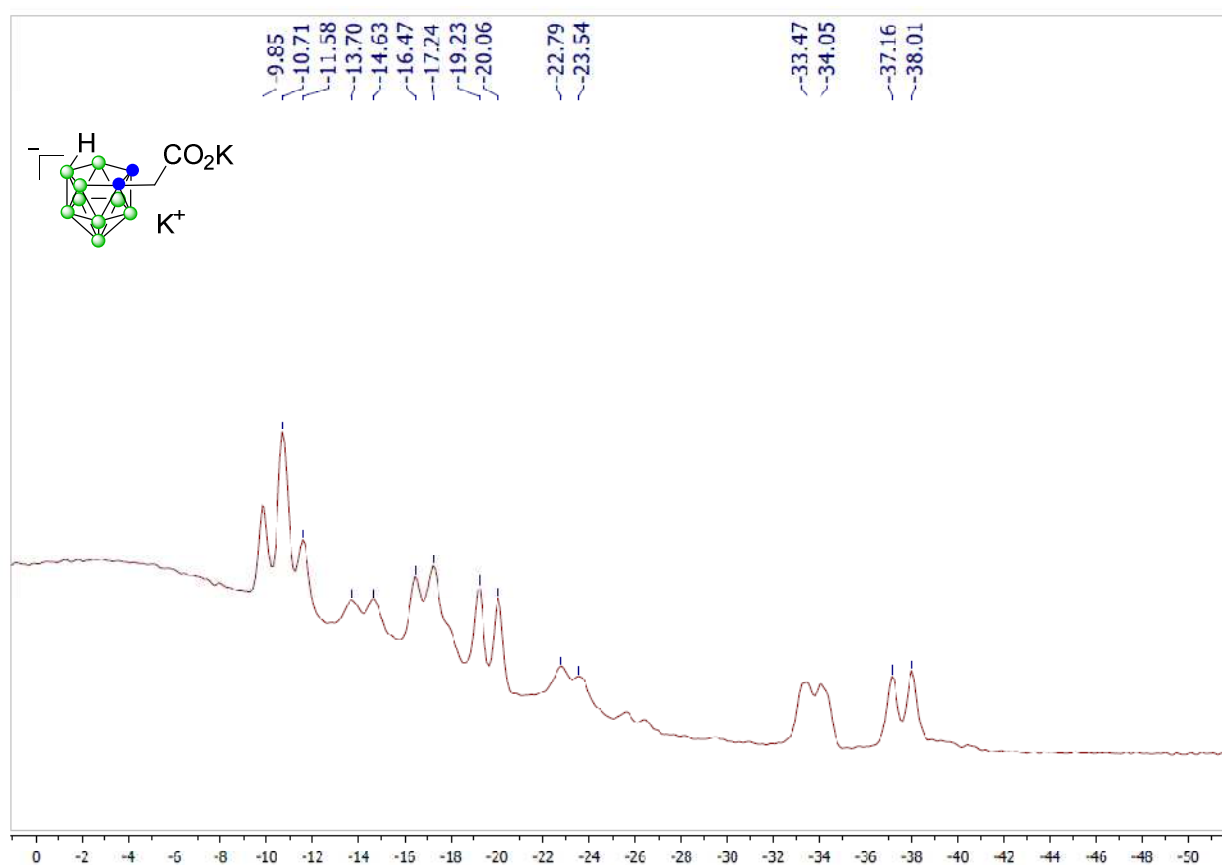

Proton-coupled <sup>11</sup>B NMR spectrum of compound **1-K** (DMSO-*d*<sub>6</sub>, 25 °C, 160 MHz)

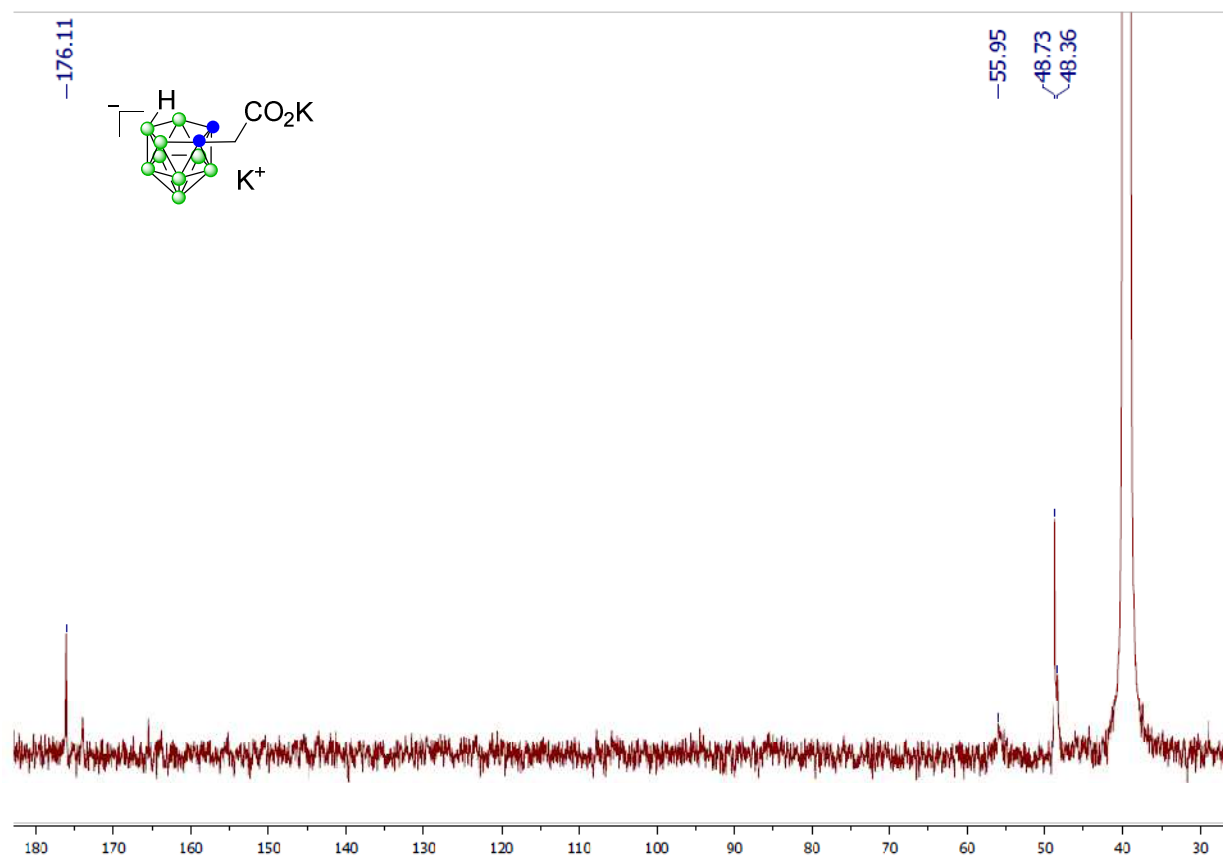

$^{13}\text{C}\{^1\text{H}\}$  NMR spectrum of compound **1-K** (DMSO- $d_6$ , 25 °C, 126 MHz)

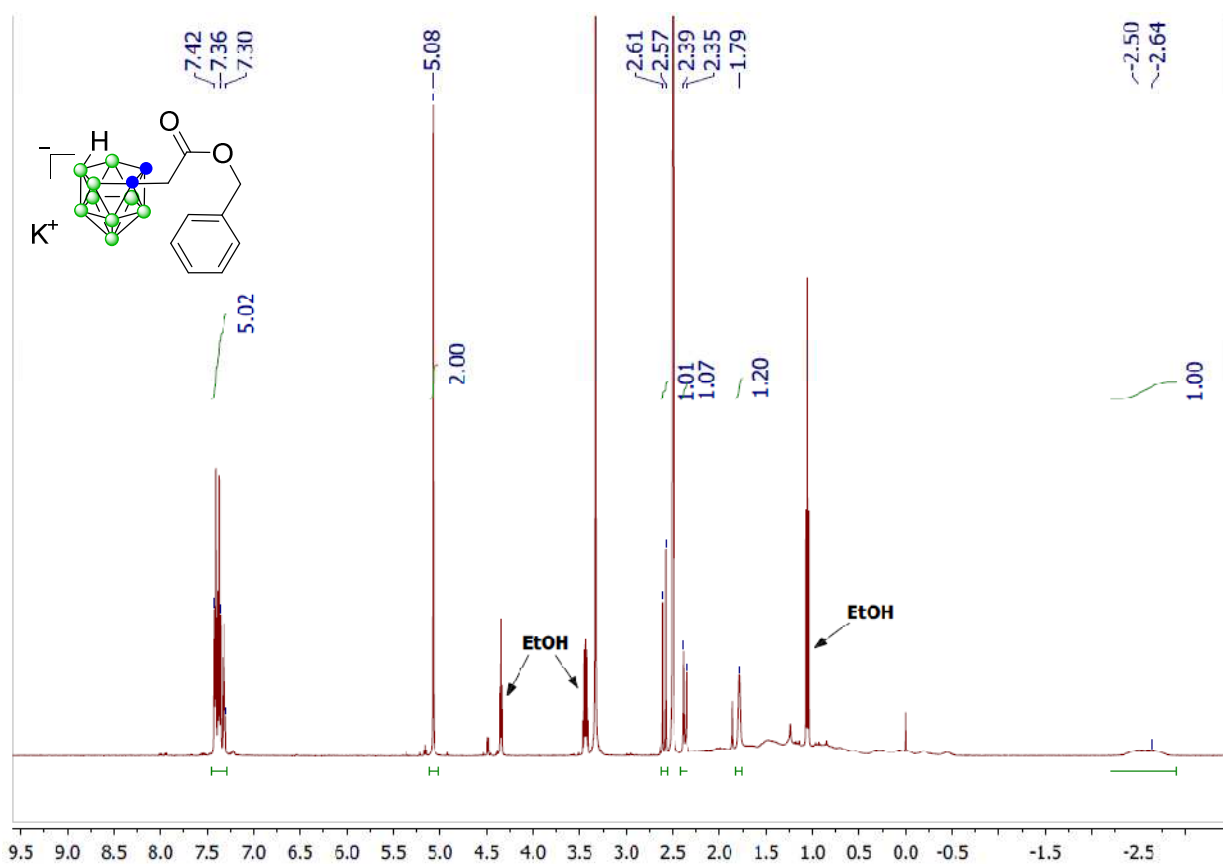

$^1\text{H}$  NMR spectrum of compound **11-K** (DMSO- $d_6$ , 25 °C, 500 MHz)

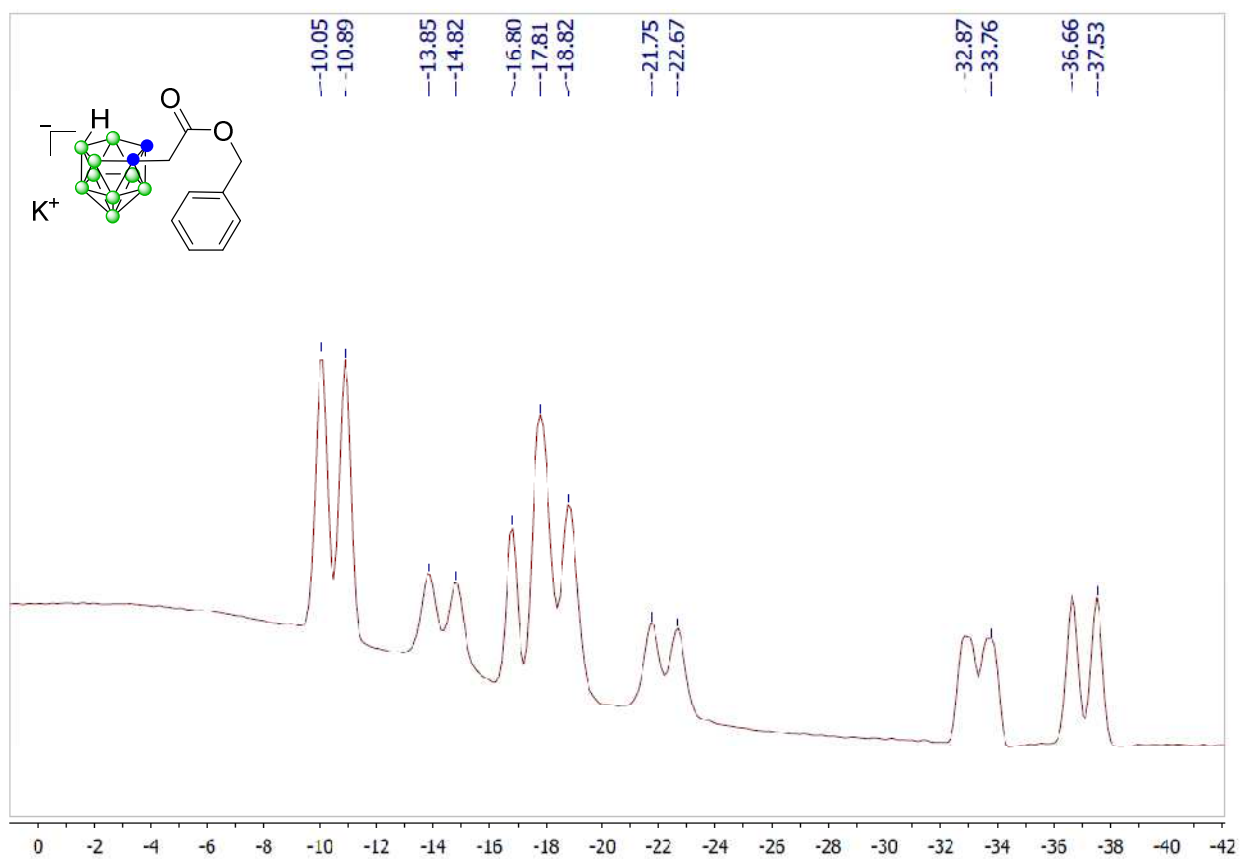

Proton-coupled  $^{11}\text{B}$  NMR spectrum of compound **11-K** (DMSO- $d_6$ , 25 °C, 160 MHz)

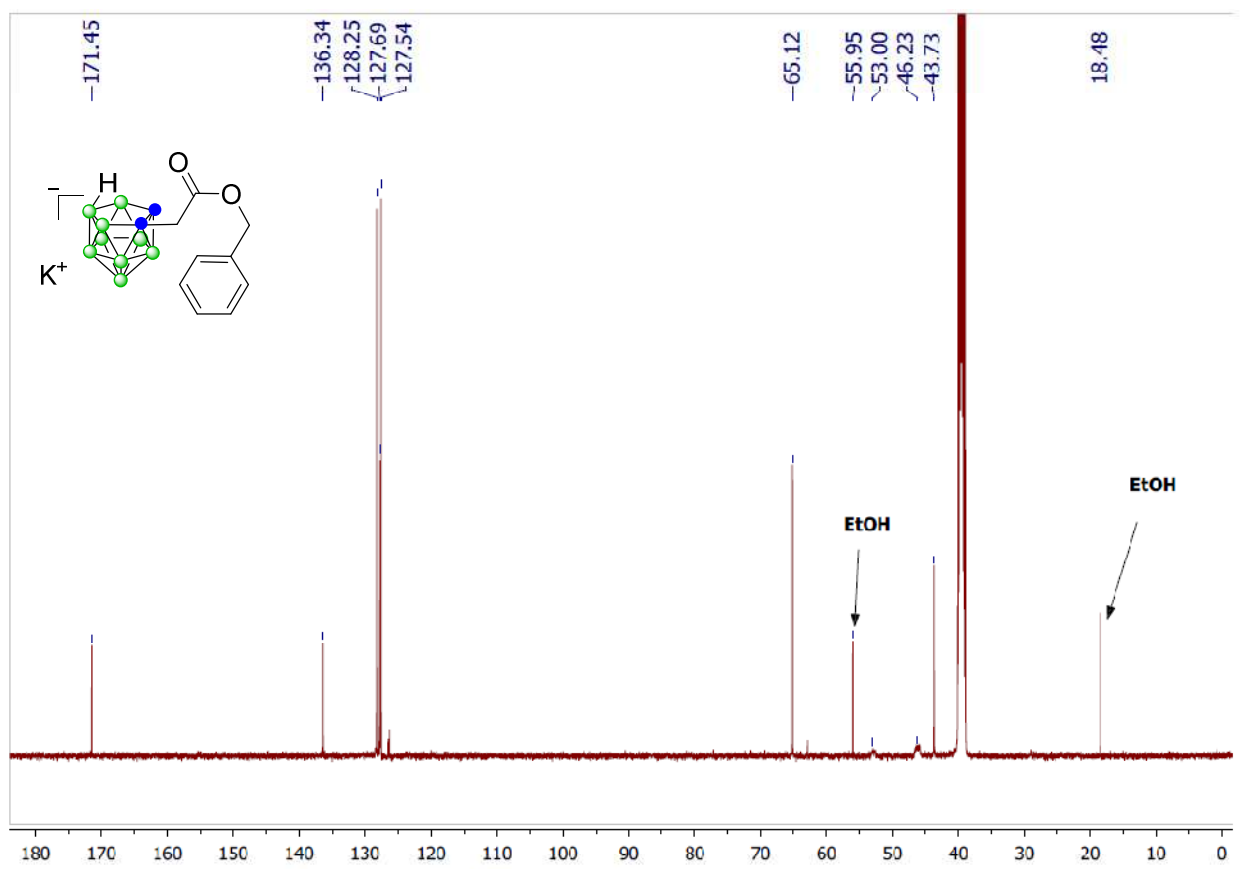

$^{13}\text{C}\{^1\text{H}\}$  NMR spectrum of compound **11-K** (DMSO- $d_6$ , 25 °C, 126 MHz)

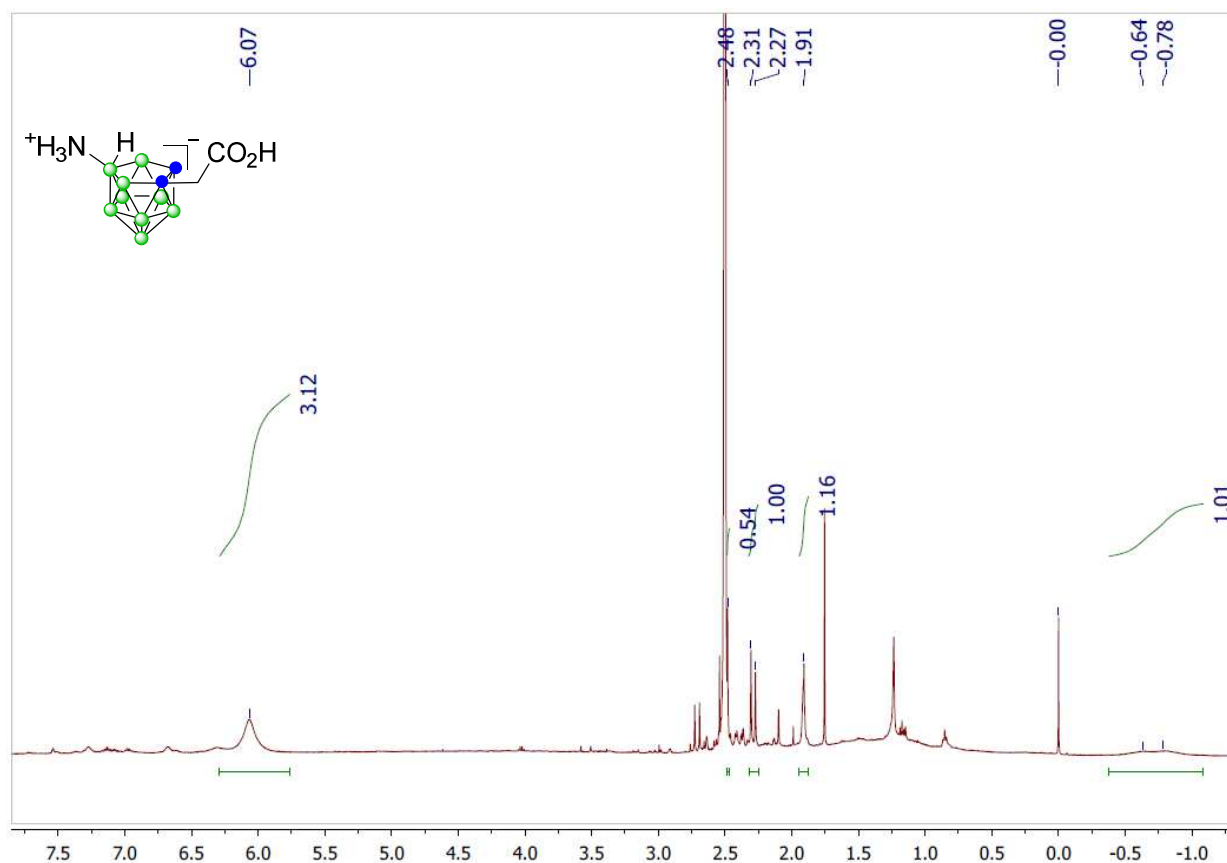

$^1H$  NMR spectrum of compound **15** (DMSO- $d_6$ , 25 °C, 500 MHz)

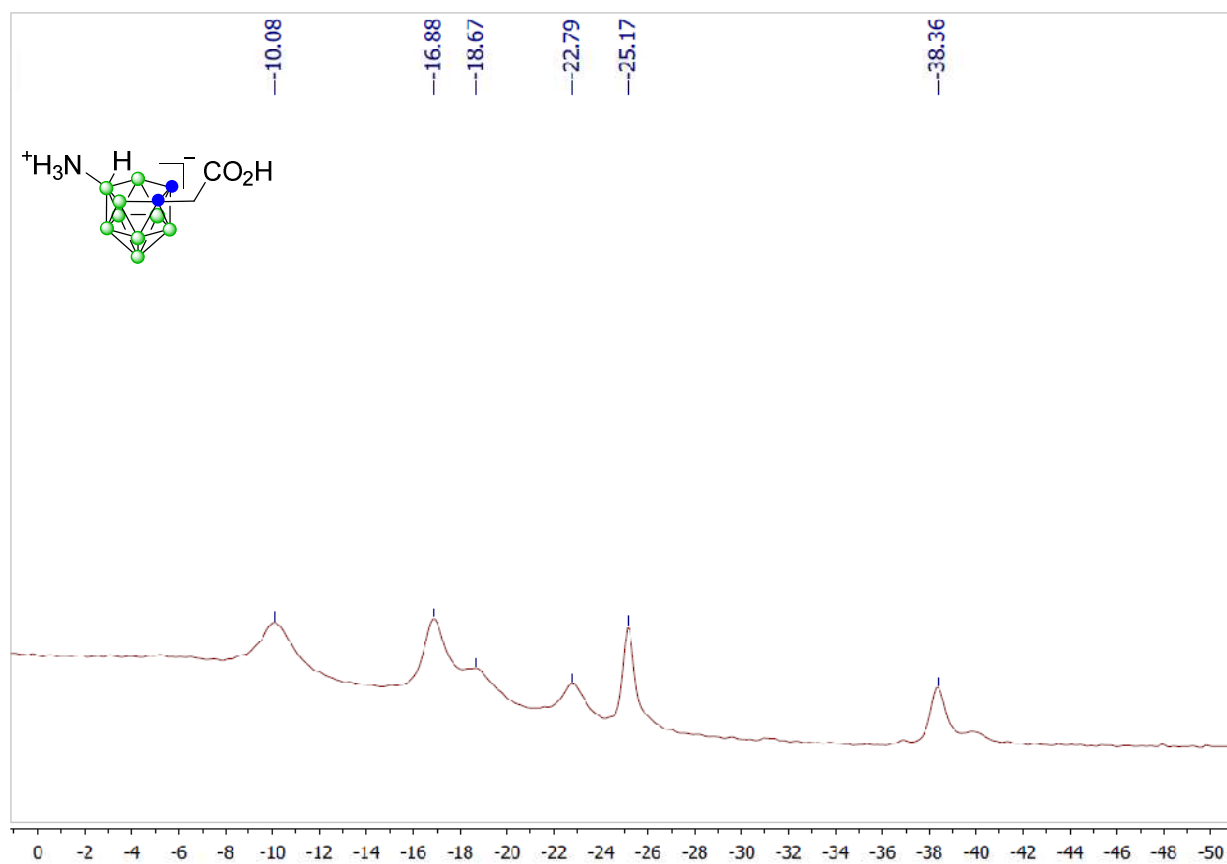

$^{11}B\{H\}$  NMR spectrum of compound **15** (DMSO- $d_6$ , 25 °C, 160 MHz)

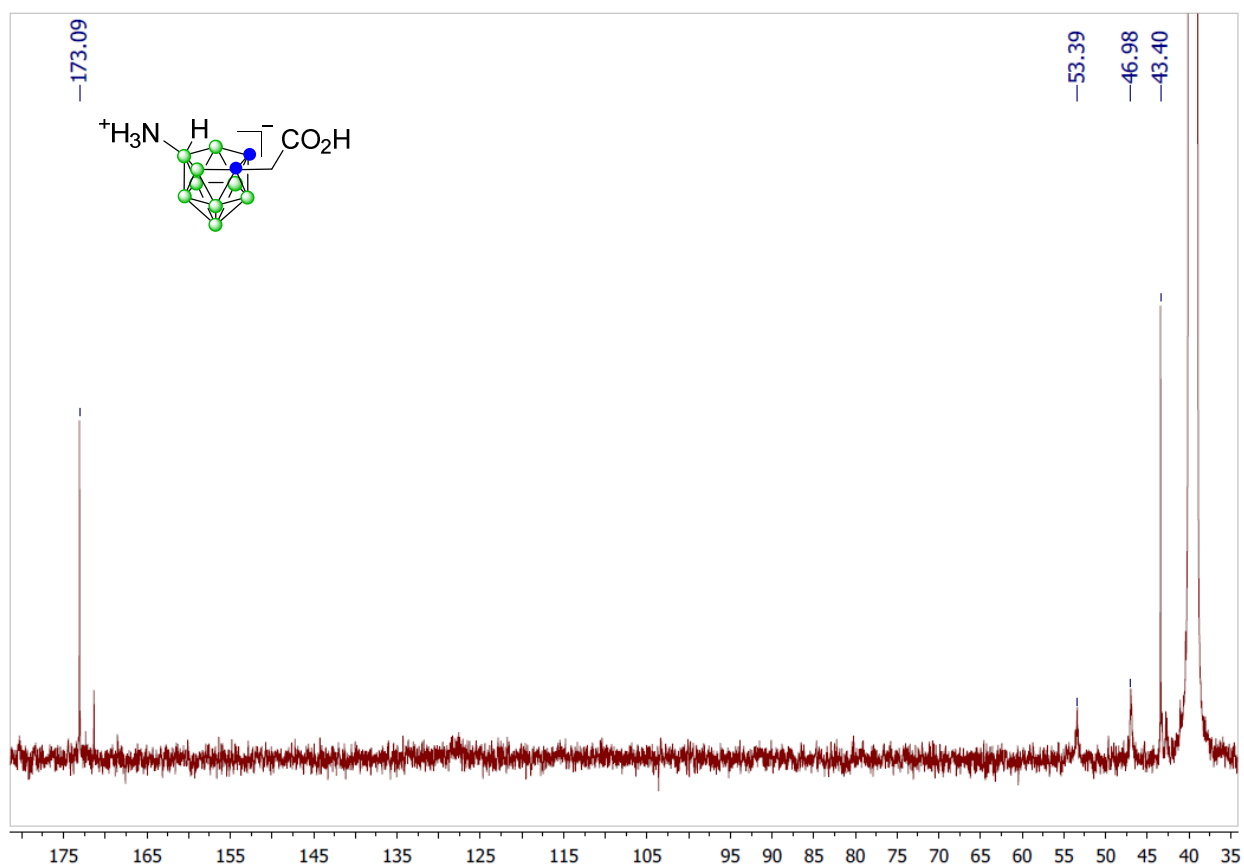

$^{13}\text{C}\{^1\text{H}\}$  NMR spectrum of compound **15** ( $\text{DMSO-}d_6$ ,  $25\text{ }^\circ\text{C}$ ,  $126\text{ MHz}$ )

### 3. Selected HPLC chromatograms

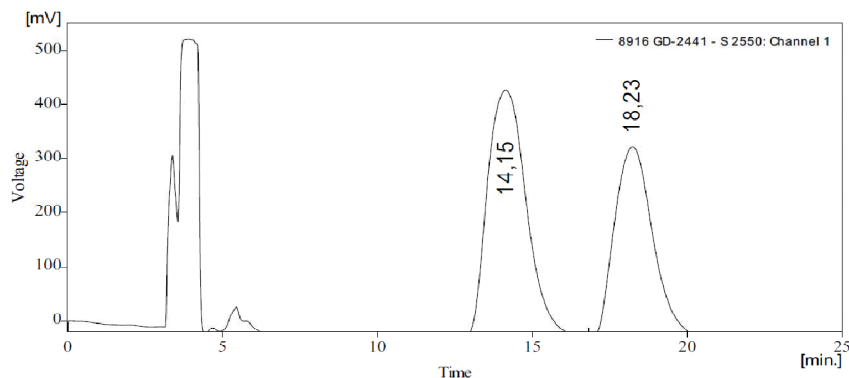

Result Table (Uncal - 8916 GD-2441 - S 2550: Channel 1)

|   | Reten. Time [min] | Area [mAU.s] | Height [mAU] | Area [%] | Height [%] | W05 [min] |
|---|-------------------|--------------|--------------|----------|------------|-----------|
| 1 | 14,150            | 40645,065    | 461,101      | 55,8     | 56,2       | 1,42      |
| 2 | 18,233            | 32149,738    | 359,087      | 44,2     | 43,8       | 1,40      |
|   | Total             | 72794,803    | 820,188      | 100,0    | 100,0      |           |

HPLC chromatogram of compound **7a** (diastereomeric mixture)  
(Chiralcel OD-H, *n*-hexane-*i*PrOH-MeOH 5 : 0.8 : 0.2, 1 mL/min)

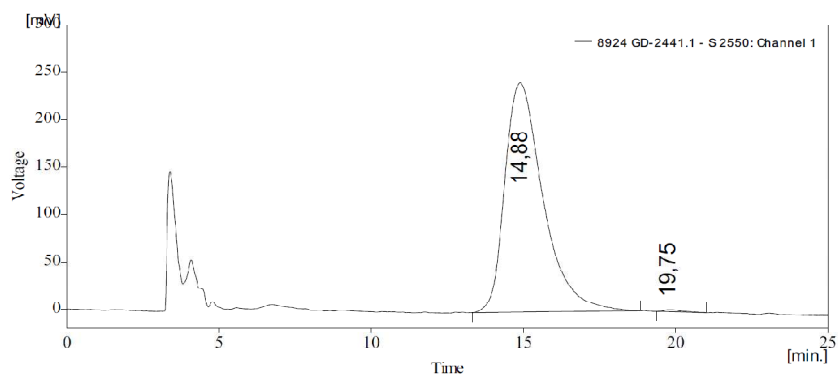

Result Table (Uncal - 8924 GD-2441.1 - S 2550: Channel 1)

|   | Reten. Time [min] | Area [mAU.s] | Height [mAU] | Area [%] | Height [%] | W05 [min] |
|---|-------------------|--------------|--------------|----------|------------|-----------|
| 1 | 14,883            | 21100,368    | 242,368      | 99,6     | 99,2       | 1,30      |
| 2 | 19,750            | 88,966       | 1,881        | 0,4      | 0,8        | 0,62      |
|   | Total             | 21189,333    | 244,249      | 100,0    | 100,0      |           |

HPLC chromatogram of compound (*S,R<sub>p</sub>*)-**7a** (Chiralcel OD-H, *n*-hexane-*i*PrOH-MeOH  
5 : 0.8 : 0.2, 1 mL/min)

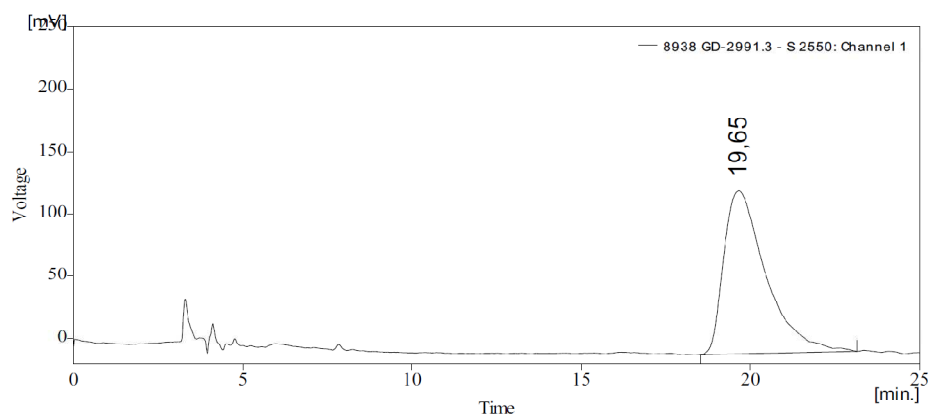

Result Table (Uncal - 8938 GD-2991.3 - S 2550: Channel 1)

|   | Reten. Time [min] | Area [mAU.s] | Height [mAU] | Area [%] | Height [%] | W05 [min] |
|---|-------------------|--------------|--------------|----------|------------|-----------|
| 1 | 19,650            | 11291,060    | 130,592      | 100,0    | 100,0      | 1,28      |
|   | Total             | 11291,060    | 130,592      | 100,0    | 100,0      |           |

HPLC chromatogram of compound (*S,S<sub>p</sub>*)-**7a** (Chiralcel OD-H, *n*-hexane-*i*PrOH-MeOH  
5 : 0.8 : 0.2, 1 mL/min)

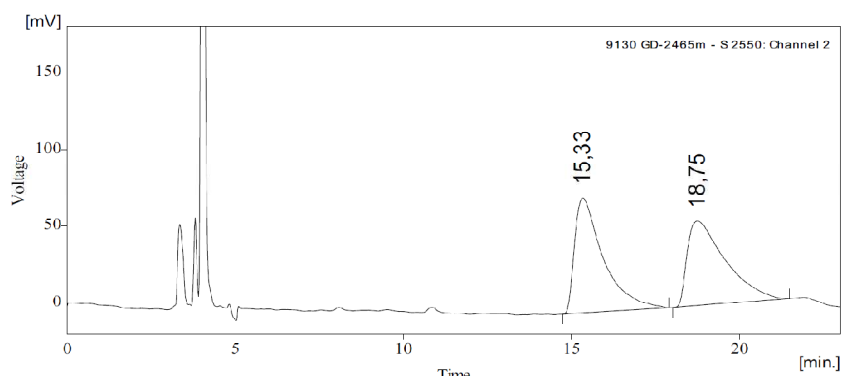

Result Table (Uncal - 9130 GD-2465m - S 2550: Channel 2)

|       | Reten. Time [min] | Area [mAU.s] | Height [mAU] | Area [%] | Height [%] | W05 [min] |
|-------|-------------------|--------------|--------------|----------|------------|-----------|
| 1     | 15,333            | 4438,512     | 74,400       | 50,4     | 57,5       | 0,87      |
| 2     | 18,750            | 4343,510     | 55,023       | 48,5     | 42,5       | 1,25      |
| Total |                   | 8782,022     | 129,423      | 100,0    | 100,0      |           |

HPLC chromatogram of compound **7b** (diastereomeric mixture)  
(Chiralcel OD-H, *n*-hexane-*i*PrOH-MeOH 50 : 4 : 2, 1 mL/min)

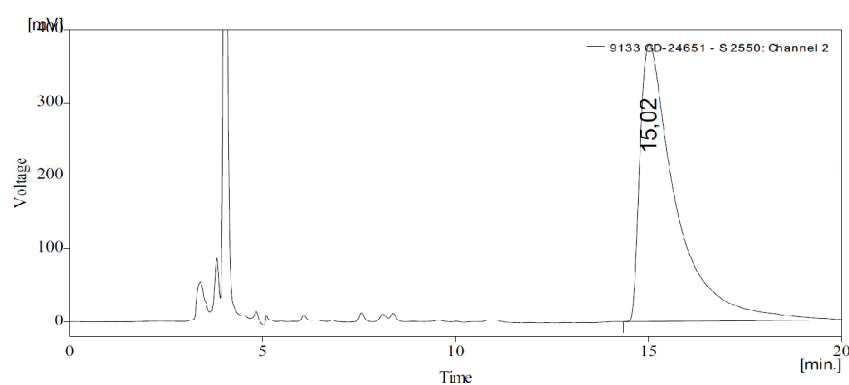

Result Table (Uncal - 9133 GD-24651 - S 2550: Channel 2)

|       | Reten. Time [min] | Area [mAU.s] | Height [mAU] | Area [%] | Height [%] | W05 [min] |
|-------|-------------------|--------------|--------------|----------|------------|-----------|
| 1     | 15,017            | 24786,960    | 380,012      | 100,0    | 100,0      | 0,88      |
| Total |                   | 24786,960    | 380,012      | 100,0    | 100,0      |           |

HPLC chromatogram of compound (*S,R<sub>p</sub>*)-**7b** (Chiralcel OD-H, *n*-hexane-*i*PrOH-MeOH 50 : 4 : 2, 1 mL/min)

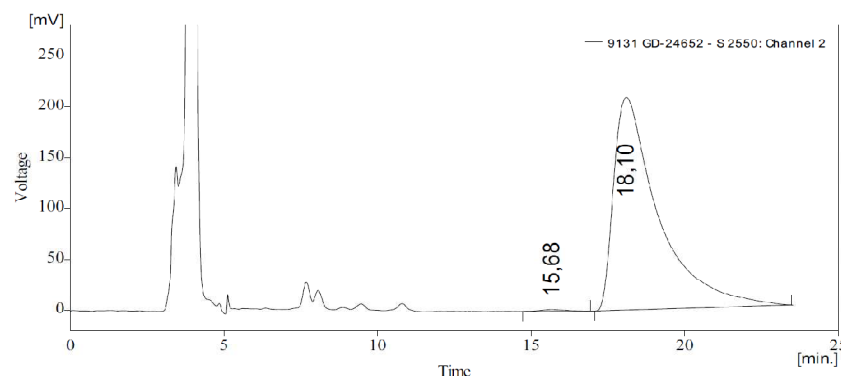

Result Table (Uncal - 9131 GD-24652 - S 2550: Channel 2)

|       | Reten. Time [min] | Area [mAU.s] | Height [mAU] | Area [%] | Height [%] | W05 [min] |
|-------|-------------------|--------------|--------------|----------|------------|-----------|
| 1     | 15,688            | 36,336       | 1,580        | 0,4      | 0,7        | 0,58      |
| 2     | 18,100            | 21176,248    | 208,814      | 99,5     | 99,3       | 1,38      |
| Total |                   | 21212,584    | 210,394      | 100,0    | 100,0      |           |

HPLC chromatogram of compound (*S,S<sub>p</sub>*)-**7b** (Chiralcel OD-H, *n*-hexane-*i*PrOH-MeOH 50 : 4 : 2, 1 mL/min)

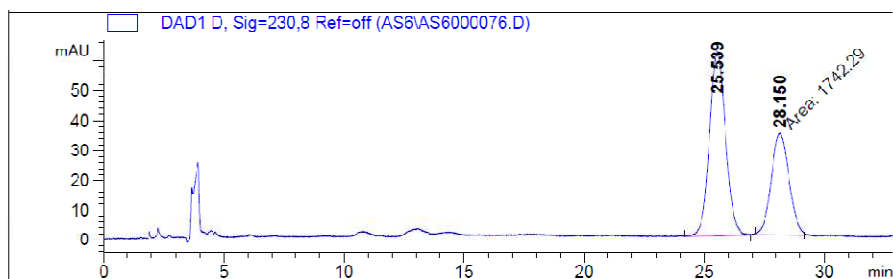

Signal 3: DAD1 D, Sig=230,8 Ref=off

| Peak # | RetTime [min] | Type | Width [min] | Area [mAU*s] | Height [mAU] | Area %  |
|--------|---------------|------|-------------|--------------|--------------|---------|
| 1      | 25.539        | BB   | 0.6414      | 2887.20117   | 61.75583     | 62.3654 |
| 2      | 28.150        | MM   | 0.8488      | 1742.29187   | 34.21258     | 37.6346 |

Totals : 4629.49304 95.96841

\*\*\* End of Report \*\*\*

HPLC chromatogram of compound **7c** (*diastereomeric mixture*)  
(S,S,-Whelk O1, H<sub>2</sub>O–MeOH 55 : 45, 0.8 mL/min)

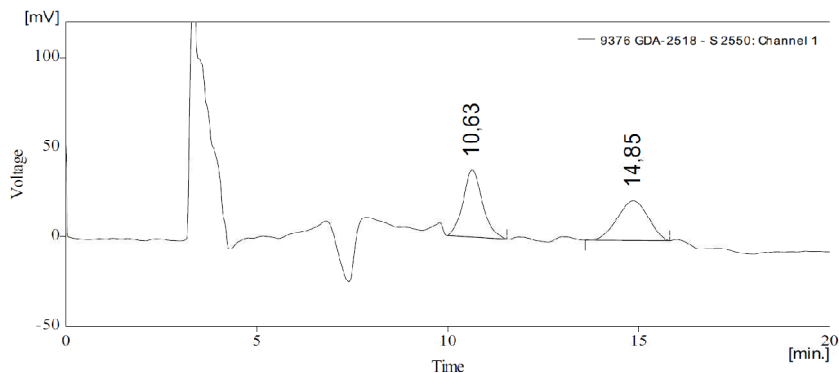

Result Table (Uncal - 9376 GDA-2518 - S 2550: Channel 1)

| Reten. Time [min] | Area [mAU.s] | Height [mAU] | Area [%] | Height [%] | W05 [min] |
|-------------------|--------------|--------------|----------|------------|-----------|
| 1                 | 1348,069     | 38,076       | 51,7     | 62,8       | 0,53      |
| 2                 | 1258,838     | 22,539       | 48,3     | 37,2       | 0,93      |
| Total             | 2606,907     | 60,615       | 100,0    | 100,0      |           |

HPLC chromatogram of compound **15** (Chiralcel OD-H, *n*-hexane–*i*PrOH–CF<sub>3</sub>CO<sub>2</sub>H 5 : 1 : 0.02,  
1 mL/min)
